1 *Journal of Virology*

2

3 **Autographa californica Multiple Nucleopolyhedrovirus *orf13* is Required for**  
4 **Efficient Nuclear Egress of Nucleocapsids**

5

6 Xingang Chen <sup>a, b</sup>, Xiaoqin Yang <sup>a, b</sup>, Chengfeng Lei <sup>a</sup>, Fujun Qin <sup>a</sup>, Jia Hu <sup>a#</sup>, and

7 Xiulian Sun <sup>a#</sup>

8

9 <sup>a</sup> Wuhan Institute of Virology, Center for Biosafety Mega-Science, Chinese Academy  
10 of Sciences, Wuhan, China

11 <sup>b</sup> University of Chinese Academy of Sciences, Beijing, China

12

13 Running head: *Ac13* is required for efficient nucleocapsid egress

14

15 <sup>#</sup> Correspondence to: J Hu, [hujia@wh.iov.cn](mailto:hujia@wh.iov.cn), XL Sun, [sunxl@wh.iov.cn](mailto:sunxl@wh.iov.cn).

16

17 Keywords: AcMNPV; *orf13*; nucleocapsid egress; OB morphogenesis

18

19 Abstract word count: 140

20 Importance word count: 96

21 Text word count: 4958

22 **ABSTRACT**

23 Autographa californica multiple nucleopolyhedrovirus (AcMNPV) *orf13* (*ac13*) is a  
24 conserved gene in all sequenced alphabaculoviruses. However, its function in the viral  
25 life cycle remains unknown. In this study we found that *ac13* was a late gene and that  
26 the encoded protein, bearing a putative nuclear localization signal motif in the  
27 DUF3627 domain, colocalized with the nuclear membrane. Deletion of *ac13* did not  
28 affect viral DNA replication, gene transcription, nucleocapsid assembly or occlusion  
29 body (OB) formation, but reduced virion budding from infected cells by  
30 approximately 400-fold compared with the wild-type virus. Deletion of *ac13*  
31 substantially impaired the egress of nucleocapsids from the nucleus to the cytoplasm,  
32 while the number of occlusion-derived viruses embedded within OBs was unaffected.  
33 Taken together, our results indicated that *ac13* was required for efficient nuclear  
34 egress of nucleocapsids during virion budding, but was dispensable for OB formation.

35

36 **IMPORTANCE**

37 Egress of baculovirus nucleocapsids from the nucleus is an essential process for  
38 morphogenesis of mature budded viruses, which is required to spread infection within  
39 susceptible cells and tissues. Although many viral and host proteins are required for  
40 nucleocapsid egress, the specific mechanisms underlying this process in baculoviruses  
41 remain somewhat enigmatic. In the present study, we found that the *ac13* gene, in  
42 addition to *ac11*, *ac51*, *ac66*, *ac75*, *ac78*, *gp41*, *ac93*, *p48*, *exon0* and *ac142*, was  
43 required for efficient nuclear egress of nucleocapsids. Our results contribute to a  
44 better understanding of nucleocapsid egress in baculoviruses.

45

## 46 INTRODUCTION

47 The Baculoviridae are a large family of insect-specific viruses with circular,  
48 covalently closed, double-stranded DNA genomes 80–180 kb in size and encoding 89  
49 to 183 genes (1, 2). Based on their genome sequences, baculoviruses can be divided  
50 into four genera: *Alphabaculovirus*, *Betabaculovirus*, *Gammabaculovirus*, and  
51 *Deltabaculovirus* (3). Alphabaculoviruses can be further subdivided into Group I and  
52 Group II viruses (4). The most notable differences between these two groups are that  
53 Group I nucleopolyhedroviruses (NPVs) use GP64 as their budded virus (BV) fusion  
54 protein, whereas Group II NPVs lack *gp64* and use the F protein (5). *Autographa*  
55 *californica* multiple nucleopolyhedrovirus (AcMNPV) is the archetype species of  
56 *Alphabaculovirus*.

57 Baculovirus infection produces two distinct viral phenotypes: BVs and  
58 occlusion-derived viruses (ODVs) (2). BVs are responsible for spreading infection  
59 within susceptible insect cells and tissues, whereas ODVs initiate primary infection in  
60 the midgut epithelia of infected insects and are transmitted among insects (6).  
61 Transcription and replication of viral DNA and assembly of nucleocapsids occur in a  
62 structure called the virogenic stroma (VS) (7, 8). Synthesized nucleocapsids are  
63 transported from the VS to the ring zone, and then egress from the nucleus to  
64 cytoplasm and bud from the plasma membrane to form BVs. Subsequently,  
65 nucleocapsids retained in the ring zone of the nucleus are enveloped by intranuclear  
66 microvesicles to form ODVs, which are then embedded within the polyhedrin to form  
67 OBs (2).

68 Most DNA viruses, including herpesviruses and baculoviruses, replicate and assemble  
69 their nucleocapsids in the nucleus (2, 9). Egress of nucleocapsids is indispensable for  
70 formation of mature virions and viral pathogenicity. This process also represents a  
71 good target for disrupting viral infection. The mechanism through which herpesvirus  
72 nucleocapsids egress has been well characterized (9, 10). By contrast, the mechanism  
73 of baculovirus nucleocapsid egress remains unclear. According to previous reports,  
74 host proteins including the actin cytoskeleton, N-ethylmaleimide-sensitive fusions  
75 proteins and endosomal sorting complex required for transport-III (11-13) as well as

76 viral proteins including Ac11, Ac51, Ac66, Ac75, Ac78, GP41, Ac93, P48, EXON0  
77 and Ac142 are required for nucleocapsid egress (14-25). Deletion of *ac11*, *ac75*, *ac78*,  
78 *gp41*, *ac93*, *p48*, or *ac142* abrogated egress of nucleocapsids from the nucleus. By  
79 contrast, loss of *ac51*, *ac66* or *exon0* reduced the efficiency of nucleocapsid egress.  
80 According to previous reports, the nucleocapsids of BVs were ubiquitinated at much  
81 higher levels than those of ODVs, indicating that nucleocapsid ubiquitination  
82 (potentially catalyzed by the viral E3 ubiquitin ligase EXON0) may play a key role in  
83 nucleocapsid egress (26). Exploring genes associated with nucleocapsid egress is  
84 important to elucidate the mechanism of nucleocapsid egress in baculoviruses.

85 *ac13*, encoding a protein of 327 amino acids with a putative molecular mass of 38.7  
86 kDa (9), is a conserved gene in all sequenced alphabaculoviruses. However, the  
87 function of *ac13* in the viral life cycle remains unknown. To date, only a few studies  
88 have examined *ac13* and its orthologs. Transcriptomic sequencing showed that *ac13*  
89 was regulated by an early promoter and a late promoter (27). InterProScan (28) and  
90 NCBI Conserved Domain Search (29) analyses revealed that Ac13 contained a  
91 DUF3627 protein domain of unknown function, which was conserved in all  
92 alphabaculovirus but not betabaculovirus orthologs. *bm5*, a homolog of *ac13* in  
93 *Bombyx mori* NPV (BmNPV), was seemingly nonessential because the viral life  
94 cycle appeared normal when it was deleted (30, 31). However, a recent study showed  
95 that although deletion of *bm5* did not affect viral DNA replication, it decreased BV  
96 and OB production (32).

97 In the present study, we investigated the function of *ac13* in the baculovirus life cycle.  
98 First, temporal analysis of transcription and transcription initiation sites (TSSs)  
99 showed that *ac13*, with an early and a late promoter, was transcribed during both the  
100 early and late phases of infection. However, the Ac13 protein was only detected  
101 during late infection and colocalized with the nuclear membrane. In addition, we  
102 determined the roles of *ac13* in BV production, viral DNA replication, viral gene  
103 transcription and OB morphogenesis. Our results indicated that *ac13* was not essential  
104 for viral DNA replication, gene transcription, nucleocapsid assembly or OB formation.  
105 However, its absence reduced the efficiency of nucleocapsid egress and decreased the

106 production of BVs.

107

## 108 **RESULTS**

### 109 **1. *ac13* is a late viral gene.**

110 Transcriptomic analysis showed that two different TSSs were located upstream of the  
111 *ac13* translation initiation codon (27). Temporal transcription patterns showed that the  
112 product of *ac13* was detected as early as 6 h post infection (h p.i.) and persisted up to  
113 48 h p.i. (Fig. 1A). Rapid amplification of 5' cDNA ends (5' RACE) revealed that the  
114 TSSs mapped to the first G of the atypical baculovirus early promoter motif GCAGT,  
115 located 217 nt upstream of the *ac13* open reading frame (ORF) start codon, and the  
116 first A of the typical late promoter motif TAAG, located 56 nt upstream of the *ac13*  
117 ORF start codon (Fig. 1B). These results indicated that expression of *ac13* was  
118 regulated by an early and a late promoter, and that the gene was transcribed during  
119 early and late infection of host cells.

120 The temporal expression profile of Ac13 was determined by western blotting of  
121 AcMNPV-infected cells at designated time points. A band of approximately 39 kDa,  
122 close to the predicted molecular mass of Ac13, was detected from 18 to 48 h p.i. (Fig.  
123 1C). To further determine whether Ac13 was expressed during late infection, Ac13  
124 was detected in AcMNPV-infected cells via the presence of aphidicolin, which  
125 inhibits viral DNA replication and thus prevents viral late gene expression. No Ac13  
126 expression was observed in aphidicolin-treated cells, while Ac13 was detected in  
127 control cells treated with dimethyl sulfoxide (DMSO) (Fig. 1D). Expression of VP39  
128 was only detected in DMSO-treated cells, while expression of GP64 was detected  
129 both in aphidicolin-treated and DMSO-treated cells (Fig. 1D). Together these results  
130 showed that despite transcription of *ac13* during early and late infection, it was a late  
131 viral gene.

### 132 **2. Ac13 is predominantly localized to the nuclear membrane.**

133 To investigate the function of Ac13 in the viral life cycle, its subcellular localization  
134 was analyzed by confocal microscopy. Sf9 cells infected with vAc<sup>*ac13Flag*REP</sup>-*ph* at a  
135 multiplicity of infection (MOI) of 5 were fixed at 12, 18, 24, 36, 48 and 72 h p.i. Ac13

136 was detected by immunofluorescence using confocal microscopy. As shown in Fig.  
137 2A, Ac13 fluorescence was predominantly localized to the nuclear rim and mainly  
138 colocalized with the nuclear lamina of the nuclear membrane from 12 until 72 h p.i..  
139 Immunoelectron microscopy was used to assess the location of Ac13 in cells infected  
140 with vAc<sup>ac13FlagREP</sup>-*ph*. At 48 h p.i., colloidal-gold-labeled Ac13 was predominantly  
141 localized to the perinuclear and nuclear membranes (Fig. 2B). These results agreed  
142 with the immunofluorescence data.

143 It was previously reported that Bm5 localized to the nuclear membrane in a  
144 DUF3627-dependent manner (32). Bioinformatic analysis indicated that there was a  
145 putative nuclear localization signal (NLS) motif in the Ac13 DUF3627 domain (Fig.  
146 2C a). To further examine the location of Ac13 in the absence of viral infection or the  
147 NLS motif, Sf9 cells were transfected with the pIB-*ac13egfp*, pIB-*ac13 $\Delta$ NLS**egfp* or  
148 pIB-*egfp* plasmids. As shown in Fig. 2C b, pIB-*ac13egfp* fluorescence was detected at  
149 the nuclear membrane, whereas pIB-*ac13 $\Delta$ NLS**egfp*, encoding a disrupted NLS,  
150 fluorescence was observed only in the cytoplasm. As a control, pIB-*egfp* showed  
151 homogenous fluorescence throughout the cytoplasm and nucleus. These results  
152 indicated that Ac13 located to the nuclear membrane independently of viral infection,  
153 but nuclear import required the NLS motif of DUF3627.

### 154 3. Ac13 is essential for BV production but not for OB formation.

155 To investigate the function of *ac13* in the AcMNPV life cycle, an *ac13*-null bacmid,  
156 bAc<sup>ac13KO</sup>-*ph*, an *ac13*-rescue bacmid, bAc<sup>ac13REP</sup>-*ph*, and a pseudo-wild-type bacmid,  
157 bAc-*ph* (Fig. 3), were constructed. All bacmids were confirmed by PCR (primer pairs  
158 shown in Table 1) and DNA sequencing (data not shown).

159 To determine the effects of the absence of *ac13* on viral proliferation and OB  
160 morphogenesis, Sf9 cells were transfected with the bAc<sup>ac13KO</sup>-*ph*, bAc<sup>ac13REP</sup>-*ph* or  
161 bAc-*ph* bacmids and monitored under a fluorescent microscope. No obvious  
162 differences were found in the numbers of fluorescent cells between the three bacmids  
163 at 24 h p.t. (Fig. 4A, upper row), indicating that the three bacmids had comparable  
164 transfection efficiencies. By 96 h p.t., almost all cells transfected with bAc<sup>ac13REP</sup>-*ph*  
165 or bAc-*ph* showed fluorescence, whereas the number of fluorescent

166 bAc<sup>ac13KO</sup>-*ph*-transfected cells increased only slightly from 24 to 96 h p.t. (Fig. 4A,  
167 upper and middle rows). This result indicated that although bAc<sup>ac13KO</sup>-*ph*-transfected  
168 cells were able to produce infectious BVs, the efficiency of BV production was  
169 impaired.

170 To further examine the effects of *ac13* deletion on viral proliferation, we collected BV  
171 supernatants from cells transfected with each bacmid at the indicated time points,  
172 determined BV titers using the 50% tissue culture infective dose (TCID<sub>50</sub>) endpoint  
173 dilution assay, and performed a viral growth curve analysis. Viruses produced from  
174 the bAc<sup>ac13REP</sup>-*ph* and bAc-*ph* bacmids showed similar growth kinetics, reaching  
175  $7.0 \times 10^8$  and  $4.0 \times 10^8$  TCID<sub>50</sub>/mL at 96 h p.t., respectively. However, the TCID<sub>50</sub> of  
176 bAc<sup>ac13KO</sup>-*ph* was reduced by 400-fold compared with bAc<sup>ac13REP</sup>-*ph* and bAc-*ph* at  
177 120 h p.t. ( $p < 0.001$ ) (Fig. 4B). Light microscopy analysis revealed that a large  
178 proportion of cells transfected with bAc-*ph* and bAc<sup>ac13REP</sup>-*ph* contained OBs at 96 h  
179 p.t., whereas only a small proportion of bAc<sup>ac13KO</sup>-*ph*-transfected cells contained OBs  
180 (Fig. 4A, lower panel). Subsequently, we collected cells transfected with bAc<sup>ac13KO</sup>-*ph*,  
181 bAc<sup>ac13REP</sup>-*ph* or bAc-*ph* from each dish at 96 h p.t. and counted OBs using a  
182 hemocytometer. As shown in Fig. 4C, the numbers of OBs produced by cells  
183 transfected with bAc<sup>ac13KO</sup>-*ph* were significantly reduced compared with the numbers  
184 produced by cells transfected with bAc-*ph* and bAc<sup>ac13REP</sup>-*ph*. These results indicated  
185 that BV production in bAc<sup>ac13KO</sup>-*ph*-transfected cells was significantly reduced  
186 compared with cells transfected with bAc-*ph* and bAc<sup>ac13REP</sup>-*ph*. By contrast, no  
187 obvious differences were found in the average numbers of OBs produced by each cell  
188 transfected with bAc<sup>ac13KO</sup>-*ph*, bAc<sup>ac13REP</sup>-*ph* or bAc-*ph* at 96 h p.t. (Fig. 4A, lower  
189 panel and Fig. 4D), indicating that *ac13* deletion had no effect on OB formation.

190 To confirm the results obtained following bacmid transfection, Sf9 cells were infected  
191 with vAc<sup>ac13KO</sup>-*ph*, vAc<sup>ac13REP</sup>-*ph* or vAc-*ph* at an MOI of 0.002 and a viral growth  
192 curve analysis was performed. As shown in Fig. 4E and F, vAc<sup>ac13REP</sup>-*ph* showed  
193 similar growth kinetics to vAc-*ph*. However, BV production in vAc<sup>ac13KO</sup>-*ph*-infected  
194 cells was significantly reduced compared with BV production in cells infected with  
195 vAc-*ph* and vAc<sup>ac13REP</sup>-*ph*. Taken together, these data suggested that *ac13* deletion



196 significantly decreased BV production, but did not affect OB formation.

#### 197 **4. *ac13* is not required for synthesis of viral DNA or transcription of viral genes.**

198 The BV life cycle includes replication of viral DNA, assembly of progeny  
199 nucleocapsids, egress from the nucleus, transport through the cytoplasm, and budding  
200 from the plasma membrane where the BV gains its envelope. To determine whether  
201 reduced vAc<sup>ac13KO</sup>-*ph* BV production resulted from a defect in viral DNA replication,  
202 viral DNA replication was compared between bAc<sup>ac13KO</sup>-*ph*- and bAc-*ph*-transfected  
203 cells by quantitative PCR (qPCR) within 24 h p.t., before secondary infection by BVs  
204 could occur (15). Sf9 cells were transfected with equal amounts of bAc<sup>ac13KO</sup>-*ph* or  
205 bAc-*ph* bacmid DNA and collected at 0, 12 and 24 h p.t.. Total intracellular DNA was  
206 extracted and treated with DpnI to eliminate input bacmid DNA. The viral genome  
207 copy number was measured by qPCR using *gp41*-specific primers as previously  
208 reported (33). As shown in Fig. 5A, the viral DNA content in bAc<sup>ac13KO</sup>-*ph* and  
209 bAc-*ph*-transfected cells both increased with similar rates from 0 to 24 h p.t. ( $p >$   
210 0.05), indicating that *ac13* deletion did not affect viral DNA replication. Subsequently,  
211 expression of six viral genes (*iel*, *pe38*, *gp64*, *vp39*, *p6.9* and *polh*) was analyzed by  
212 reverse transcription (RT)-qPCR. As shown in Fig. 5B, no significant differences were  
213 found in the transcript levels of any genes between bAc<sup>ac13KO</sup>-*ph*- and  
214 bAc-*ph*-transfected cells ( $p > 0.05$ ). These results suggested that *ac13* deletion did not  
215 affect early or late viral gene transcription.

#### 216 **5. Ac13 is required for efficient nuclear egress.**

217 To further explore the impediments to BV production in the absence of *ac13*,  
218 transmission electron microscopy (TEM) was used to examine thin sections generated  
219 from cells infected with vAc<sup>ac13KO</sup>-*ph*, vAc<sup>ac13REP</sup>-*ph* or vAc-*ph* at an MOI of 10 at 48  
220 h p.i.. As shown in Fig. 6A, the typical symptoms of baculovirus infection appeared  
221 both in vAc<sup>ac13KO</sup>-*ph*- and vAc-*ph*-infected cells. These included an enlarged nucleus  
222 with a net-shaped VS, a large number of rod-shaped electron-dense nucleocapsids  
223 within the VS, and mature ODVs with multiple nucleocapsids and ODV-containing  
224 OBs around the ring zone. As expected, vAc<sup>ac13REP</sup>-*ph*-infected cells exhibited similar  
225 characteristics to those of cells infected with vAc-*ph*. According to the above results,

226 *ac13* deletion did not affect either nucleocapsid assembly or OB formation.  
227 *Ac13* localized to the nuclear membrane, and therefore it might play a role in egress  
228 of nucleocapsids from the nucleus. The TEM analysis was used to assess whether  
229 *ac13* deletion had any effect on egress. According to methods previously reported (15,  
230 16, 24), we counted and compared the numbers of intranuclear and egressed  
231 nucleocapsids in 20 randomly chosen cells infected with vAc<sup>*ac13*KO</sup>-*ph*, vAc<sup>*ac13*REP</sup>-*ph*  
232 or vAc-*ph*. The egressed nucleocapsids included nucleocapsids exiting the nuclear  
233 membrane, in transport through the cytoplasm and budding from the cytoplasmic  
234 membrane (Fig. 6A d, h and i). Intranuclear nucleocapsids of vAc<sup>*ac13*KO</sup>-*ph*-infected  
235 cells were comparable to those of vAc<sup>*ac13*REP</sup>-*ph*- and vAc-*ph*-infected cells (Fig. 6B  
236 a). By contrast, egressed nucleocapsids were substantially reduced in  
237 vAc<sup>*ac13*KO</sup>-*ph*-infected cells compared with vAc<sup>*ac13*REP</sup>-*ph*- and vAc-*ph*-infected cells  
238 ( $p < 0.001$ ) (Fig. 6B b). Taken together, these data showed that *ac13* deletion impaired  
239 nucleocapsid egress.

#### 240 **6. *ac13* deletion does not affect OB morphogenesis in *Spodoptera exigua* larvae.**

241 The above results indicated that *ac13* deletion did not affect the number of OBs  
242 formed within each cell. To further investigate whether the absence of *ac13* had an  
243 effect on OB morphogenesis in larvae, scanning electron microscopy (SEM) and  
244 TEM were performed on OBs purified from *S. exigua* cadavers infected with vAc-*ph*,  
245 vAc<sup>*ac13*KO</sup>-*ph* or vAc<sup>*ac13*REP</sup>-*ph*. As shown in Fig. 7A, the OBs formed within  
246 vAc<sup>*ac13*KO</sup>-*ph*-infected larvae had smooth surfaces and sharp edges and contained  
247 normal ODVs, similar to those of vAc-*ph*- or vAc<sup>*ac13*REP</sup>-*ph*-infected larvae.  
248 Subsequently, we negatively stained and counted the numbers of ODVs within OBs of  
249 the three viruses using TEM. The average number of ODVs per OB of vAc<sup>*ac13*KO</sup>-*ph*  
250 was comparable to those of vAc-*ph* or vAc<sup>*ac13*REP</sup>-*ph* ( $p > 0.05$ ) (Fig. 7B). Taken  
251 together, these results showed that *ac13* was not required for OB morphogenesis in  
252 larvae.

253

#### 254 **DISCUSSION**

255 The *ac13* gene is conserved in all sequenced alphabaculoviruses, implying that it may

256 play an important role in the viral life cycle. In the present study, we investigated the  
257 role of *ac13* in AcMNPV by constructing an *ac13*-null bacmid (bAc<sup>ac13KO</sup>-*ph*). We  
258 determined that *ac13* was required for efficient egress of nucleocapsids from the  
259 nucleus to the cytoplasm, but not for OB formation.

260 The 5' RACE and sequence analyses indicated that *ac13* was regulated by an atypical  
261 early promoter (GCAGT) and a canonical late promoter (TAAG) in  
262 AcMNPV-infected Sf9 cells. The TSS of the late promoter was consistent with  
263 previous studies. However, the TSS of the early promoter differed by 2 nt from  
264 previous data generated from AcMNPV-infected *Trichoplusia ni* cells. A potential  
265 explanation for this discrepancy might be that different hosts impact the TSS usage of  
266 AcMNPV. In addition to *ac13*, 11 other genes (*ac23*, *pkip*, *v-fgf*, *pp31*, *odv-e66*, *ac82*,  
267 *he65*, *gp64*, *p35*, *me53* and *ie0*) contain both early (TATAA or CAGT) and late  
268 (TAAG) motifs in AcMNPV (27). Global analysis of AcMNPV gene expression in the  
269 midgut of *T. ni* indicated that *ac13* gene transcripts could be detected from 6 to 72 h  
270 p.i, with higher expression than most other AcMNPV genes (34). Our analysis of *ac13*  
271 temporal transcription patterns agreed with those results. Thus, *ac13* may play an  
272 important role in infection *in vivo* and *in vitro* both at early and late stages, although  
273 the Ac13 protein can only be detected during late infection. However, we cannot rule  
274 out the possibility that levels of Ac13 expression during the early stage were too low  
275 to be detected. It is also possible that the *ac13* gene may play a role in early infection  
276 not through an encoded protein but through other types of gene products (i.e., peptides  
277 or non-coding RNAs), or may participate as a DNA element. Several *cis*-acting  
278 elements have been identified in AcMNPV. For example, Ac83 was required for *per*  
279 *os* infectivity factor (PIF) complex formation and was deemed a true PIF (35), while  
280 *ac83* is involved in nucleocapsid envelopment via an internal *cis*-acting element (36).  
281 We found that Ac13 localized at the nuclear membrane independently of viral  
282 infection, consistent with a prior study of the subcellular localization of Bm5 (32).  
283 Protein nuclear import typically requires a NLS, which assists transport through the  
284 nuclear pore complex into the nucleus. Previous studies identified several proteins  
285 with NLSs in AcMNPV including LEF-3, DNAPol, IE1 and BV/ODV-C42 (37-39).

286 Bioinformatic and confocal microscopy analyses indicated the presence of an NLS  
287 motif in Ac13, which played an essential role in its nuclear import (Fig. 2C). However,  
288 bioinformatic analysis suggested that Ac13 is not an integral membrane protein.  
289 Yet-unknown proteins may facilitate the nuclear membrane accumulation of Ac13.  
290 It was reported that *bm5* encodes a multifunctional protein that regulates viral  
291 transcription and OB formation and contributed to BV production (32). However, in  
292 our study, observation of cells transfected with bAc<sup>ac13KO</sup>-*ph* and bAc-*ph*  
293 demonstrated that *ac13* deletion reduced BV production by 99.7%, but did not affect  
294 OB formation. The *Cm<sup>r</sup>* cassette was reversibly inserted in the *ac13* ORF, completely  
295 disrupting *ac13* expression without affecting transcription or expression of the  
296 neighbor genes *lef1* and *ac12*. The phenotype of the *ac13* knockout could be rescued  
297 by a repair virus. Similarly, a repair virus was able to rescue the phenotype associated  
298 with *bm5* deletion (35). Thus, OB formation was affected by *bm5* deletion, whereas  
299 OBs were observed in cells transfected with bAc<sup>ac13KO</sup>-*ph* at near-wild type levels  
300 (Fig. 4 and Fig. 7). This discrepancy may result from the different measurement  
301 methods use. In the Bm5 study, OB formation was confirmed by counting the number  
302 of OBs in the whole dish. Because *bm5* deletion reduced BV production and  
303 decreased the number of cells undergoing secondary infection, the number of  
304 *bm5*-null-infected cells may have been lower than the number of cells infected with  
305 wild-type virus. In our study, we assessed OB formation by counting the number of  
306 OBs per cell and observed the shape and inner structure of OBs via SEM and TEM.  
307 Differences may also have resulted from the different viruses used. Several genes  
308 have been reported to show discrepancies in knockout phenotypes between AcMNPV  
309 and BmNPV. For instance, *gp41* is essential for AcMNPV replication (21) but not for  
310 BmNPV replication (30). Additionally, *ac51* is required for BV production but not for  
311 OB morphogenesis in AcMNPV (15), while *bm40*, an orthologous gene of *ac51* in  
312 BmNPV, is essential for BV and OB morphogenesis (40).  
313 The nuclear membrane accumulation of Ac13 suggested that it may be involved in  
314 nucleocapsid egress from the nucleus. In the alphaherpesviruses, pUL31 and pUL34,  
315 which are required for egress of nucleocapsids from the nucleus to cytoplasm, are

316 codependently localized to the nuclear rim (41). Largely based on the results of TEM  
317 analyses, nucleocapsid egress from the nucleus is thought to occur through a process  
318 of budding from the nuclear membrane (42), and a recent study demonstrated that  
319 baculovirus nucleocapsid egress from the nucleus by disrupting the nuclear membrane  
320 (12). We used TEM to examine and compare cells infected with vAc<sup>ac13KO</sup>-*ph*,  
321 vAc<sup>ac13REP</sup>-*ph* and vAc-*ph*. The results showed that *ac13* deletion did not affect  
322 nucleocapsid assembly or progression of viral infection into very late phases to form  
323 OBs, but impaired efficient egress of nucleocapsids from the nucleus to the cytoplasm.  
324 Several AcMNPV genes have been reported to be involved in nuclear egress of  
325 nucleocapsids including *ac11*, *ac51*, *ac66*, *ac75*, *ac78*, *gp41*, *ac93*, *p48*, *exon0* and  
326 *ac142*. The first to be identified, *exon0*, is not strictly essential for production of BVs  
327 because a few nucleocapsids in cells infected with an *exon0*-null virus did pass  
328 through the nuclear membrane. Recently, Qiu et al. demonstrated that the *ac51*  
329 deletion affected the efficiency of nuclear egress of nucleocapsids, but did not affect  
330 nucleocapsid assembly and ODV envelopment (15). In this study, the genes required  
331 for the nuclear egress of nucleocapsids and production of BVs seemed to be divided  
332 into two categories (15): (i) genes whose deletion did not affect nucleocapsid  
333 assembly but prevented nuclear egress of nucleocapsids, thus abrogating BV  
334 production and also interrupting OB formation, and (ii) genes whose deletion did not  
335 affect nucleocapsid assembly but decreased the efficiency of nuclear egress of  
336 nucleocapsids, thus decreasing BV production but not affecting OB formation.  
337 According to previous reports, *exon0*, *ac66* and *ac51* belong to the second category.  
338 Our results confirm that *ac13* is a fourth gene belonging to the second category.  
339 In summary, nucleocapsid egress is essential for mature BV production and virus  
340 proliferation. Although many host and viral genes associated with nuclear egress have  
341 been determined, the process is incompletely understood in baculoviruses. In the  
342 present study, we investigated the functions of *ac13* and found that it was required for  
343 efficient nuclear egress of nucleocapsids during BV production, but not for OB  
344 formation *in vivo* and *in vitro*.

## 346 **MATERIALS AND METHODS**

### 347 **Cells, viruses, insect and antibodies**

348 Sf9 cells were cultured at 27°C in Grace's medium (Invitrogen, Carlsbad, CA, USA)  
349 supplemented with 10% fetal bovine serum (Gibco, Grand Island, NY, USA).  
350 AcMNPV recombinant bacmids were constructed with the bMON14272 bacmid  
351 (Invitrogen) and maintained in *Escherichia coli* strain DH10B (Invitrogen), which  
352 also contained helper plasmids for homologous recombination and transposition.

353 The anti-Ac13 polyclonal antiserum was prepared in rabbits according to previously  
354 published methods (21). The polyclonal anti-GP64 and anti-VP39 antibodies were  
355 gifts from Z. H. Hu (Wuhan Institute of Virology, China). Mouse monoclonal  
356 anti-actin antibody was from Proteintech (Wuhan, China) and mouse monoclonal  
357 anti-Dm0 antibody was from the Developmental Studies Hybridoma Bank (DSHB;  
358 Iowa City, IA, USA).

### 359 **Time course analysis of transcription and expression**

360 Sf9 cells ( $1.0 \times 10^6$  cells/ $\Phi$ 35-mm plate) were infected with AcMNPV at an MOI of 5  
361 and collected at 0, 3, 6, 12, 24, 36 and 48 h p.i.. Total RNA was extracted using  
362 RNAiso Plus (TaKaRa, Dalian, China) according to the manufacturer's instructions  
363 and quantitated using a Nanodrop-2000 spectrophotometer (Thermo Fisher Scientific,  
364 Waltham, MA, USA). Subsequently, cDNA was synthesized using an iScript cDNA  
365 synthesis kit (Bio-Rad, Hercules, CA, USA). Finally, transcripts were detected by  
366 PCR using gene-specific primer pairs (primer sequences shown in Table 1) and the  
367 above cDNA as a template.

368 For the time course analysis of Ac13 expression, Sf9 cells ( $1.0 \times 10^6$  cells/ $\Phi$ 35-mm  
369 plate) were infected with AcMNPV at an MOI of 10 and harvested at 0, 6, 12, 18, 24  
370 and 48 h p.i.. Subsequently, western blotting was performed with anti-Ac13 (1:1,000)  
371 primary antibody and horseradish peroxidase-conjugated goat anti-rabbit (1:3,000;  
372 Proteintech) secondary antibody. A protein ladder (Thermo Fisher Scientific) was  
373 used to judge protein sizes.

### 374 **The 5' RACE analysis**

375 Sf9 cells ( $1.0 \times 10^6$  cells/ $\Phi$ 35-mm plate) were infected with AcMNPV at an MOI of 5

376 and collected at 4 and 24 h p.i. Total RNA was isolated using RNAiso Plus (TaKaRa).  
377 The 5' RACE reaction was performed with an *ac13*-specific primer (*ac13*-GSP1)  
378 using a SMARTer<sup>®</sup> RACE 5'/3' Kit (TaKaRa) according to the manufacturer's  
379 protocol. The PCR products were cloned into the pMD19-T vector (TaKaRa) and  
380 sequenced.

### 381 **Construction of *ac13* knockout and repaired bacmids**

382 An *ac13* knockout bacmid was constructed as previously described (43, 44). First, a  
383 618-bp sequence upstream and a 686-bp sequence downstream of the *ac13* ORF were  
384 amplified by PCR using the primer pairs *ac13*-US-F/R and *ac13*-DS-F/R, respectively,  
385 and the AcMNPV bacmid as template. A 1,137-bp fragment was amplified using the  
386 primer pairs *Cm<sup>r</sup>*-F/R using the pUC18-*Cm<sup>r</sup>* plasmid as the template. Subsequently,  
387 the 618-bp upstream fragment, the 686-bp downstream fragment and the 1,137-bp  
388 fragment were double-digested with SacI/BamHI, HindIII/XhoI and BamHI/HindIII,  
389 respectively. The three restriction digestion fragments were gel purified and  
390 consecutively ligated into the pBlueScript II SK(+) vector to generate  
391 pSK-*ac13*US-*Cm<sup>r</sup>*-*ac13*DS. A fragment, amplified using the primer pair  
392 *ac13*-US-F/*ac13*-DS-R and template pSK-*ac13*US-*Cm<sup>r</sup>*-*ac13*DS, was used to  
393 electroporate *E. coli* BW25113 cells (containing bMON14727 and pKD46) to replace  
394 the N-terminal 174-bp (nt 43514 nt to 43638 of the AcMNPV genome) of *ac13* with  
395 the *Cm<sup>r</sup>* cassette via  $\lambda$ Red homologous recombination. The resulting *ac13*-null bacmid,  
396 confirmed by PCR and DNA sequencing, was named bAc<sup>*ac13*KO</sup>.

397 Subsequently, the *polh* and the *egfp* genes were separately cloned into the  
398 pFastBacDual vector (Invitrogen) under the control of the *polh* and *p10* promoters via  
399 restriction digestion and ligation to generate pFBD-*ph-egfp*. DH10B competent cells,  
400 containing the helper plasmid pMON7124 and the bAc<sup>*ac13*KO</sup> bacmid, were transfected  
401 with the pFBD-*ph-egfp* plasmid, generating an *ac13*-null bacmid (bAc<sup>*ac13*KO</sup>-*ph*) by  
402 Tn7-mediated transposition. Similarly, a wild-type control bacmid (bAc-*ph*) was  
403 generated by inserting the *polh* and *egfp* genes into the *polh* locus of bMON1427. To  
404 construct an *ac13* rescue bacmid, a 1,458-bp fragment containing the *ac13* native  
405 promoter and ORF was amplified by PCR with the primer pair Dual-*ac13*-F1/R1 from

406 the bMON1427 template. The 1,458-bp fragment was inserted in the pFBD-*ph-egfp*  
407 plasmid to produce pFBD-*ph-ac13-egfp* via homologous recombination. This vector  
408 was then used to transform DH10B competent cells (containing bAc<sup>ac13KO</sup> and  
409 pMON7124) to generate an *ac13*-rescue bacmid (bAc<sup>ac13REP</sup>-*ph*). Meanwhile, another  
410 *ac13* rescue bacmid bAc<sup>ac13FlagREP</sup>-*ph*, encoding a FLAG tag at its 3'-end, was  
411 constructed using the same method. All recombinant bacmids were confirmed by PCR  
412 and DNA sequencing.

### 413 **Construction of *ac13* subcellular localization plasmids**

414 The transient expression plasmid pIB-*egfp* was constructed using FastCloning (45).  
415 Briefly, the pIB/V5-His vector (Invitrogen) and insert *egfp* fragment were amplified  
416 by PCR. The *egfp* fragment 16 bp sequence was homologous with the vector. The  
417 PCR products were digested with DpnI (TaKaRa) at 37°C for 1 h, and then used to  
418 transform *E. coli* DH5 $\alpha$  competent cells. Subsequently, the *ac13* ORF was amplified  
419 from the AcMNPV bacmid and subcloned into pIB-*egfp* in-frame with the *egfp*  
420 fragment to generate pIB-*ac13egfp* by FastCloning. Based on the pIB-*ac13egfp* vector,  
421 the pIB-*ac13* <sup>$\Delta$ NLS</sup>*egfp* vector bearing a truncated *ac13* gene with an NLS deletion (aa  
422 778–810) was also constructed by FastCloning.

### 423 **Transfection and infection assay**

424 Sf9 cells were seeded in a 35-mm diameter six-well plate ( $1.0 \times 10^6$  cells/well) and  
425 allowed to attach for 2 h at 27°C. The cells were transfected in triplicate with 10  $\mu$ g of  
426 each bacmid DNA (bAc<sup>ac13KO</sup>-*ph*, bAc<sup>ac13REP</sup>-*ph* and bAc-*ph*) using 8  $\mu$ L of Cellfectin  
427 II (Invitrogen) according to the manufacturer's instructions. The transfection buffer  
428 was then replaced with fresh Grace's medium after incubation for 5 h. The BVs  
429 contained in the supernatant was called vAc<sup>ac13KO</sup>-*ph*, vAc<sup>ac13REP</sup>-*ph*, and vAc-*ph*.  
430 BVs were harvested at 24, 48, 72, 96 and 120 h p.t. and viral titers were determined  
431 using a TCID<sub>50</sub> endpoint dilution assay. Cells were infected in triplicate with each  
432 virus at an MOI of 0.002. After viral absorption for 1 h at 27°C, the infection mixture  
433 was replaced with fresh Grace's medium, and the time point was designated 0 h p.i.  
434 Cell supernatant was harvested at 12, 24, 48, 72, 96 and 120 h p.i., and viral titers  
435 were also determined for virus growth curve analysis (46). The viral titers were



436 compared using F tests at each time point.

### 437 **Quantitative analysis of viral DNA synthesis and viral gene transcription**

438 The qPCR analysis was performed as previously described (33) with some  
439 modifications. The RT-qPCR analysis was performed as previously described (47)  
440 with some modifications.

### 441 **Fluorescence confocal microscopy analysis**

442 Confocal immunofluorescence microscopy was performed as previously described  
443 (48). Sf9 cells were seeded ( $1 \times 10^6$  cells/dish) on a glass dish and allowed to attach for  
444 2 h, then infected with vAc<sup>ac13FlagREP</sup>-*ph* at an MOI of 5. The cells were fixed with 4%  
445 paraformaldehyde for 10 min at the designated times. After washing with  
446 phosphate-buffered saline (PBS), the fixed cells were treated with 0.2% Triton X-100  
447 for 10 min and then blocked with PBS containing 5% bovine serum albumin and 0.1%  
448 Tween-20 for 30 min. Subsequently, the cells were incubated with rabbit anti-FLAG  
449 polyclonal antibody (1:500, Proteintech) and mouse anti-Dm0 monoclonal antibody  
450 (1:500, DSHB) for 1 h followed by Alexa Fluor 594 goat anti-rabbit IgG (1:1000,  
451 Proteintech) and Alexa Fluor 647 goat anti-mouse IgG (1:1000, Proteintech) for 1 h in  
452 dark. Finally, the cells were stained with Hoechst 33258 (Beyotime, Shanghai, China)  
453 for 7 min in the dark and examined using a Leica SP5 confocal laser scanning  
454 microscope using a 60× dipping lens.

### 455 **TEM analysis**

456 Sf9 cells were seeded ( $1 \times 10^6$  cells/dish) and allowed to adhere for 2 h, then infected  
457 with vAc<sup>ac13KO</sup>-*ph*, vAc<sup>ac13REP</sup>-*ph*, and vAc-*ph*. At 48 h p.i., the cells were fixed with  
458 2.5% glutaraldehyde for 2 h for TEM as previously described (49). Ultrathin sections  
459 were visualized using a Tecnai G20 TWIN transmission electron microscope. Twenty  
460 intact cells infected with vAc<sup>ac13KO</sup>-*ph*, vAc<sup>ac13REP</sup>-*ph* or vAc-*ph* were randomly  
461 chosen to analyze nucleocapsid egress. The numbers of intranuclear and egressed  
462 nucleocapsids in each cell were counted using ImageJ software  
463 (<https://imagej.nih.gov/ij/>) and compared using the Kruskal-Wallis test followed by  
464 Dunn's multiple comparison test.

### 465 **TEM, SEM and negative staining analysis**

466 OBs were purified from larvae by differential centrifugation according to the method  
467 described by Gross et al (50) and observed by TEM (Hitachi Co., Ltd., Tokyo, Japan)  
468 and SEM (HITACHI SU-8010; Tokyo, Japan) as described previously (51). To

469 observe ODVs embedded within OBs, 10  $\mu$ L of OB suspension ( $10^8$  OBs/mL) were  
470 loaded onto a copper grid for 10 min. Filter paper was used to remove the remaining  
471 solution from the grid. Then, 10  $\mu$ L of dissolution buffer was added to dissolve the  
472 OBs for 1 min. After removing the dissolution buffer, the grid was stained with 2%  
473 (w/v) phosphotungstic acid (pH 5.7) for 1 min. The grids were kept at room  
474 temperature overnight and observed by TEM. The ODVs in each OB were counted  
475 using ImageJ software (<https://imagej.nih.gov/ij/>) and their numbers were compared  
476 using the Kruskal-Wallis test followed by Dunn's multiple comparison test.

477 **Acknowledgments**

478 This work was supported by the National Key Research and Development  
479 Program of China (2017YFD0201206) and the WIV “One-Three-Five” strategic  
480 program (Y602111SA1 to XS). The funders had no role in study design, data  
481 collection and interpretation, or the decision to submit the work for publication. We  
482 thank the Core Facility and Technical Support of the Wuhan Institute of Virology,  
483 Chinese Academy of Sciences, for technical assistance with fluorescence microscopy  
484 (Ding Gao), flow cytometry (Juan Min), and electron microscopy (Pei Zhang, Anna  
485 Du and Bichao Xu).

486

487 **Conflict of interest:**

488 The authors declare that they have no conflict of interest.

489

490

491           **REFERENCES**

- 492   1.       **Williams T, Bergoin M, van Oers MM.** 2017. Diversity of large DNA viruses of invertebrates. *J*  
493        *Invertebr Pathol* **147**:4-22.
- 494   2.       **Rohrmann GF.** 2014. *Baculovirus Molecular Biology* (3rd edition). National Center for  
495        Biotechnology Information, Bethesda, MD.
- 496   3.       **Jehle JA, Blissard GW, Bonning BC, Cory JS, Herniou EA, Rohrmann GF, Theilmann DA,**  
497        **Thiem SM, Vlaskovits JM.** 2006. On the classification and nomenclature of baculoviruses: a  
498        proposal for revision. *Arch Virol* **151**:1257-1266.
- 499   4.       **Herniou EA, Luque T, Chen X, Vlaskovits JM, Winstanley D, Cory JS, O'Reilly DR.** 2001. Use of  
500        whole genome sequence data to infer baculovirus phylogeny. *J Virol* **75**:8117-8126.
- 501   5.       **Pearson MN, Rohrmann GF.** 2002. Transfer, incorporation, and substitution of envelope  
502        fusion proteins among members of the Baculoviridae, Orthomyxoviridae, and Metaviridae  
503        (insect retrovirus) families. *J Virol* **76**:5301-5304.
- 504   6.       **Slack J, Arif BM.** 2006. The Baculoviruses Occlusion - Derived Virus: Virion Structure and  
505        Function, p. 99-165, *Advances in Virus Research*, vol. 69. Academic Press.
- 506   7.       **Fraser MJ.** 1986. Ultrastructural Observations of Virion Maturation in *Autographa-Californica*  
507        Nuclear Polyhedrosis-Virus Infected *Spodoptera-Frugiperda* Cell-Cultures. *J. Ultrastruct. Mol.*  
508        *Struct. Res.* **95**:189-195.
- 509   8.       **Young JC, MacKinnon EA, Faulkner P.** 1993. The Architecture of the Virogenic Stroma in  
510        Isolated Nuclei of *Spodoptera frugiperda* Cells in Vitro Infected by *Autographa californica*  
511        Nuclear Polyhedrosis Virus. *Journal of Structural Biology* **110**:141-153.
- 512   9.       **Johnson DC, Baines JD.** 2011. Herpesviruses remodel host membranes for virus egress. *Nat*  
513        *Rev Microbiol* **9**:382-394.
- 514   10.      **Hellberg T, Passvogel L, Schulz KS, Klupp BG, Mettenleiter TC.** 2016. Nuclear Egress of  
515        Herpesviruses: The Prototypic Vesicular Nucleocytoplasmic Transport. *Adv Virus Res*  
516        **94**:81-140.
- 517   11.      **Yue Q, Yu Q, Yang Q, Xu Y, Guo Y, Blissard GW, Li Z.** 2018. Distinct Roles of Cellular ESCRT-I  
518        and ESCRT-III Proteins in Efficient Entry and Egress of Budded Virions of *Autographa*  
519        *californica* Multiple Nucleopolyhedrovirus. *J Virol* **92**:e01636-01617.
- 520   12.      **Ohkawa T, Welch MD.** 2018. Baculovirus Actin-Based Motility Drives Nuclear Envelope  
521        Disruption and Nuclear Egress. *Curr Biol* **28**:2153-2159.
- 522   13.      **Guo Y, Yue Q, Gao J, Wang Z, Chen YR, Blissard GW, Liu TX, Li Z.** 2017. Roles of Cellular NSF  
523        Protein in Entry and Nuclear Egress of Budded Virions of *Autographa californica* Multiple  
524        Nucleopolyhedrovirus. *J Virol* **91**:e011111-011117.
- 525   14.      **Tao XY, Choi JY, Kim WJ, An SB, Liu Q, Kim SE, Lee SH, Kim JH, Woo SD, Jin BR, Je YH.** 2015.  
526        *Autographa californica* multiple nucleopolyhedrovirus ORF11 is essential for budded-virus  
527        production and occlusion-derived-virus envelopment. *J Virol* **89**:373-383.
- 528   15.      **Qiu J, Tang Z, Cai Y, Wu W, Yuan M, Yang K.** 2019. The *Autographa californica* Multiple  
529        Nucleopolyhedrovirus *ac51* Gene Is Required for Efficient Nuclear Egress of Nucleocapsids  
530        and Is Essential for In Vivo Virulence. *J Virol* **93**:e01923-01918.
- 531   16.      **Ke J, Wang J, Deng R, Wang X.** 2008. *Autographa californica* multiple nucleopolyhedrovirus  
532        *ac66* is required for the efficient egress of nucleocapsids from the nucleus, general synthesis  
533        of preoccluded virions and occlusion body formation. *Virology* **374**:421-431.
- 534   17.      **Guo YJ, Fu SH, Li LL.** 2017. *Autographa californica* multiple nucleopolyhedrovirus *ac75* is

- 535 required for egress of nucleocapsids from the nucleus and formation of de novo intranuclear  
536 membrane microvesicles. *PLoS One* **12**:e0185630.
- 537 18. **Shi A, Hu Z, Zuo Y, Wang Y, Wu W, Yuan M, Yang K.** 2017. *Autographa californica* Multiple  
538 Nucleopolyhedrovirus *ac75* Is Required for the Nuclear Egress of Nucleocapsids and  
539 Intranuclear Microvesicle Formation. *Journal of Virology* **92**:e01509-01517.
- 540 19. **Tao XY, Choi JY, Kim WJ, Lee JH, Liu Q, Kim SE, An SB, Lee SH, Woo SD, Jin BR, Je YH.** 2013.  
541 The *Autographa californica* multiple nucleopolyhedrovirus ORF78 is essential for budded  
542 virus production and general occlusion body formation. *J Virol* **87**:8441-8450.
- 543 20. **Olszewski J, Miller LK.** 1997. A role for baculovirus GP41 in budded virus production. *Virology*  
544 **233**:292-301.
- 545 21. **Li Y, Shen S, Hu L, Deng F, Vlcek JM, Hu Z, Wang H, Wang M.** 2018. The functional oligomeric  
546 state of tegument protein GP41 is essential for baculovirus BV and ODV assembly. *Journal of*  
547 *Virology* **92**:e02083-02017.
- 548 22. **Yuan M, Huang Z, Wei D, Hu Z, Yang K, Pang Y.** 2011. Identification of *Autographa californica*  
549 nucleopolyhedrovirus *ac93* as a core gene and its requirement for intranuclear microvesicle  
550 formation and nuclear egress of nucleocapsids. *Journal of Virology* **85**:11664-11674.
- 551 23. **Yuan M, Wu W, Liu C, Wang Y, Hu Z, Yang K, Pang Y.** 2008. A highly conserved baculovirus  
552 gene *p48 (ac103)* is essential for BV production and ODV envelopment. *Virology* **379**:87-96.
- 553 24. **Fang M, Dai X, Theilmann DA.** 2007. *Autographa californica* multiple nucleopolyhedrovirus  
554 EXON0 (ORF141) is required for efficient egress of nucleocapsids from the nucleus. *Journal of*  
555 *Virology* **81**:9859-9869.
- 556 25. **McCarthy CB, Dai X, Donly C, Theilmann DA.** 2008. *Autographa californica* multiple  
557 nucleopolyhedrovirus *ac142*, a core gene that is essential for BV production and ODV  
558 envelopment. *Virology* **372**:325-339.
- 559 26. **Biswas S, Willis LG, Fang M, Nie Y, Theilmann DA.** 2017. *Autographa californica*  
560 Nucleopolyhedrovirus AC141 (Exon0), a Potential E3 Ubiquitin Ligase, Interacts with Viral  
561 Ubiquitin and AC66 To Facilitate Nucleocapsid Egress. *Journal of Virology* **92**:e01713-01717.
- 562 27. **Chen YR, Zhong S, Fei Z, Hashimoto Y, Xiang JZ, Zhang S, Blissard GW.** 2013. The  
563 transcriptome of the baculovirus *Autographa californica* multiple nucleopolyhedrovirus in  
564 *Trichoplusia ni* cells. *J Virol* **87**:6391-6405.
- 565 28. **Jones P, Binns D, Chang HY, Fraser M, Li W, McAnulla C, McWilliam H, Maslen J, Mitchell A,**  
566 **Nuka G, Pesseat S, Quinn AF, Sangrador-Vegas A, Scheremetjew M, Yong SY, Lopez R,**  
567 **Hunter S.** 2014. InterProScan 5: genome-scale protein function classification. *Bioinformatics*  
568 **30**:1236-1240.
- 569 29. **Marchler-Bauer A, Bo Y, Han L, He J, Lanczycki CJ, Lu S, Chitsaz F, Derbyshire MK, Geer RC,**  
570 **Gonzales NR, Gwadz M, Hurwitz DI, Lu F, Marchler GH, Song JS, Thanki N, Wang Z,**  
571 **Yamashita RA, Zhang D, Zheng C, Geer LY, Bryant SH.** 2017. CDD/SPARCLE: functional  
572 classification of proteins via subfamily domain architectures. *Nucleic Acids Res*  
573 **45**:D200-D203.
- 574 30. **Ono C, Kamagata T, Taka H, Sahara K, Asano S, Bando H.** 2012. Phenotypic grouping of 141  
575 BmNPVs lacking viral gene sequences. *Virus Res* **165**:197-206.
- 576 31. **Xiaoyong L, Keping C, Keya C, Qin Y.** 2008. Determination of protein composition and  
577 host-derived proteins of *Bombyx mori* nucleopolyhedrovirus by 2-dimensional  
578 electrophoresis and mass spectrometry. *Intervirology* **51**:369-376.

- 579 32. **Kokusho R, Koh Y, Fujimoto M, Shimada T, Katsuma S.** 2016. Bombyx mori  
580 nucleopolyhedrovirus BM5 protein regulates progeny virus production and viral gene  
581 expression. *Virology* **498**:240-249.
- 582 33. **Vanarsdall AL, Okano K, Rohrmann GF.** 2005. Characterization of the replication of a  
583 baculovirus mutant lacking the DNA polymerase gene. *Virology* **331**:175-180.
- 584 34. **Shrestha A, Bao K, Chen YR, Chen W, Wang P, Fei Z, Blissard GW.** 2018. Global Analysis of  
585 Baculovirus Autographa californica Multiple Nucleopolyhedrovirus Gene Expression in the  
586 Midgut of the Lepidopteran Host Trichoplusia ni. *J Virol* **92**:e01277-01218.
- 587 35. **Javed MA, Biswas S, Willis LG, Harris S, Pritchard C, van Oers MM, Donly BC, Erlandson MA,  
588 Hegedus DD, Theilmann DA.** 2017. Autographa californica Multiple Nucleopolyhedrovirus  
589 AC83 is a Per Os Infectivity Factor (PIF) Protein Required for Occlusion-Derived Virus (ODV)  
590 and Budded Virus Nucleocapsid Assembly as well as Assembly of the PIF Complex in ODV  
591 Envelopes. *J Virol* **91**:e02115-02116.
- 592 36. **Huang Z, Pan M, Zhu S, Zhang H, Wu W, Yuan M, Yang K.** 2017. The Autographa californica  
593 Multiple Nucleopolyhedrovirus *ac83* Gene Contains a cis-Acting Element That Is Essential for  
594 Nucleocapsid Assembly. *J Virol* **91**:e02110-02116.
- 595 37. **Victoria A, Mei Y, Carstens EB.** 2009. Characterization of a baculovirus nuclear localization  
596 signal domain in the late expression factor 3 protein. *Virology* **385**:209-217.
- 597 38. **Feng G, Krell PJ.** 2014. Autographa californica multiple nucleopolyhedrovirus DNA  
598 polymerase C terminus is required for nuclear localization and viral DNA replication. *J Virol*  
599 **88**:10918-10933.
- 600 39. **Olson VA, Wetter JA, Friesen PD.** 2002. Baculovirus transregulator IE1 requires a dimeric  
601 nuclear localization element for nuclear import and promoter activation. *J Virol*  
602 **76**:9505-9515.
- 603 40. **Shen YW, Feng M, Wu XF.** 2018. Bombyx mori nucleopolyhedrovirus ORF40 is essential for  
604 budded virus production and occlusion-derived virus envelopment. *Journal of General*  
605 *Virology* **99**:837-850.
- 606 41. **Klupp BG, Granzow H, Fuchs W, Keil GM, Finke S, Mettenleiter TC.** 2007. Vesicle formation  
607 from the nuclear membrane is induced by coexpression of two conserved herpesvirus  
608 proteins. *Proc Natl Acad Sci U S A* **104**:7241-7246.
- 609 42. **Blissard GW, Theilmann DA.** 2018. Baculovirus Entry and Egress from Insect Cells. *Annu Rev*  
610 *Virol* **5**:113-139.
- 611 43. **Datsenko KA, Wanner BL.** 2000. One-step inactivation of chromosomal genes in Escherichia  
612 coli K-12 using PCR products. *Proc Natl Acad Sci U S A* **97**:6640-6645.
- 613 44. **Li J, Zhou Y, Lei C, Fang W, Sun X.** 2015. Improvement in the UV resistance of baculoviruses  
614 by displaying nano-zinc oxide-binding peptides on the surfaces of their occlusion bodies. *Appl*  
615 *Microbiol Biotechnol* **99**:6841-6853.
- 616 45. **Li C, Wen A, Shen B, Lu J, Huang Y, Chang Y.** 2011. FastCloning: a highly simplified,  
617 purification-free, sequence- and ligation-independent PCR cloning method. *BMC Biotechnol*  
618 **11**:92.
- 619 46. **Lei C, Yang J, Hu J, Sun X.** 2020. On the Calculation of TCID50 for Quantitation of Virus  
620 Infectivity. *Virol Sin.*
- 621 47. **Peng Y, Li K, Pei RJ, Wu CC, Liang CY, Wang Y, Chen XW.** 2012. The protamine-like  
622 DNA-binding protein P6.9 epigenetically up-regulates Autographa californica multiple

- 623 nucleopolyhedrovirus gene transcription in the late infection phase. *Virology* **27**:57-68.
- 624 48. **Xu C, Wang J, Yang J, Lei C, Hu J, Sun X.** 2019. NSP2 forms viroplasm during *Dendrolimus*  
625 *punctatus* cytopovirus infection. *Virology* **533**:68-76.
- 626 49. **Qin F, Xu C, Hu J, Lei C, Zheng Z, Peng K, Wang H, Sun X.** 2019. Dissecting the Cell Entry  
627 Pathway of Baculovirus by Single-Particle Tracking and Quantitative Electron Microscopic  
628 Analysis. *J Virol* **93**:e00033-00019.
- 629 50. **Gross CH, Russell RL, Rohrmann GF.** 1994. *Orgyia pseudotsugata* baculovirus p10 and  
630 polyhedron envelope protein genes: analysis of their relative expression levels and role in  
631 polyhedron structure. *J Gen Virol* **75**:1115-1123.
- 632 51. **Kuang W, Zhang H, Wang M, Zhou NY, Deng F, Wang H, Gong P, Hu Z.** 2017. Three Conserved  
633 Regions in Baculovirus Sulfhydryl Oxidase P33 Are Critical for Enzymatic Activity and Function.  
634 *J Virol* **91**:e01158-01117.
- 635
- 636

637 **Figure Legends**

638

639 **FIG 1 Transcription and expression analysis of *ac13* in Sf9 cells.** (A) RT-PCR  
640 analysis of *ac13* transcription. Total RNA was extracted from AcMNPV-infected Sf9  
641 cells at the indicated time points and were amplified the transcripts of *ac13*, *ie1* and  
642 *vp39*, respectively. (B) 5' RACE analysis of *ac13* TSS. Total RNAs were extracted  
643 from AcMNPV-infected cells at 4 and 24 h p.i. and subjected to 5' RACE analysis.  
644 The late promoter (TAAG) and the early promoter (GCAGT) were denoted in box and  
645 the two TSS were shown with arrowhead. (C) Western blots analysis the temporal  
646 expression of Ac13. The Sf9 cells, infected with AcMNPV at an MOI of 10, were  
647 harvested at the indicated time points and detected with anti-Ac13 antibody. (D)  
648 Western blots analysis of the expression of Ac13 with aphidicolin. The  
649 AcMNPV-infected cells were treated with 5 µg/ml aphidicolin (+) or DMSO control  
650 (-) at 0 h p.i. and then processed at 24 h p.i. and detected with anti-Ac13. The  
651 anti-VP39, anti-GP64 and anti-actin were used as controls.

652

653 **FIG 2 Subcellular localization of Ac13 in Sf9 cells.** (A) Immunofluorescence  
654 analysis. Sf9 cells, infected with vAc<sup>*ac13Flag<sup>REP</sup>*</sup>-*ph* at an MOI of 5, were fixed with  
655 paraformaldehyde at the indicated time points and immunostained with an anti-FLAG  
656 antibody to detect Ac13 (red), an anti-Dm0 antibody to detect LaminB1 (purple).  
657 EGFP was an indicator of cells infected with virus (green). The nuclei were stained  
658 with Hoechst33258 (blue). Bars, 5 µm. (B) Immunoelectron microscopy analysis. Sf9



659 cells were infected with vAc<sup>ac13FlagREP</sup>-*ph* at an MOI of 10 and harvested at 48 h p.i.  
660 The ultrathin sections were probed with anti-FLAG antibody as the primary antibody  
661 and goat anti-rabbit IgG coated with gold particles (10 nm) as the secondary. Bars, 1  
662  $\mu$ m and 200 nm. (C) (a) Schematic representation of the NLS of Ac13. The NLS of  
663 Ac13 was predicted in the DUF3627. (b) Fluorescence microscope analysis. Sf9 cell,  
664 transfected with the plasmids pIB-*ac13egfp*, pIB-*ac13<sup>ΔNLS</sup>egfp* or pIB-*egfp*, were  
665 analyzed by immunofluorescence microscopy at 24 h p.t.. EGFP was an indicator of  
666 Ac13 (green), and an anti-Dm0 antibody was used to detect the LaminB1 in cells  
667 (red). The nuclei were stained with Hoechst 33258 (blue). Bars, 5  $\mu$ m.

668

669 **FIG 3 Schematic diagram of bAc<sup>ac13KO</sup>-*ph*, bAc<sup>ac13REP</sup>-*ph* and bAc-*ph***  
670 **construction.** Using the bacmid bMON14272, the bAc13KO was generated by  
671 replacing 146 bp fragment of the *ac13* ORF with a chloramphenicol resistance (*Cm<sup>r</sup>*)  
672 gene cassette via homologous recombination. The *egfp* and *polh* genes were inserted  
673 into the *polh* locus of bAc13KO via Tn7-mediated transposition to generate  
674 bAc<sup>ac13KO</sup>-*ph*. The *ac13* together with the *egfp* and *polh* genes were inserted into the  
675 *polh* locus of bAc13KO to generate bAc<sup>ac13REP</sup>-*ph*. bAc-*ph* was constructed by  
676 inserting the *egfp* and *polh* genes into the *polh* locus of bMON14272.

677

678 **FIG 4 Analysis of viral replication and occlusion body formation in the**  
679 **transfected/infected Sf9 cells.** (A) Fluorescence microscopy of cells transfected with  
680 the bacmids of bAc-*ph*, bAc<sup>ac13KO</sup>-*ph* or bAc<sup>ac13REP</sup>-*ph* at 24 or 96 h p.t. (upper and

681 middle rows). Light microscopy of cells transfected with each bacmid at 96 h p.t.  
682 (lower row). (B) The supernatants of Sf9 cells, transfected with bAc-*ph*, bAc<sup>ac13KO</sup>-*ph*  
683 or bAc<sup>ac13REP</sup>-*ph*, were harvested at the designated time points and quantified by  
684 TCID<sub>50</sub> endpoint dilution assays. Each data points represent average titers from three  
685 separate transfections. Error bars represent standard deviations (SD). (C) OB  
686 production in each dish. The cells were gently scraped, and total OBs were measured  
687 using hemocytometer at 96 h p.t.. \*\* indicates  $p < 0.01$ , n.s. indicates no significance,  
688  $p > 0.05$ . (D) OB production in each cell. The number of envisaged-visible OBs was  
689 under phase contrast microscope counted at 96 h p.t., and more than 50 cells were  
690 counted for each condition. n.s. indicates no significance,  $p > 0.05$ . (E) Fluorescence  
691 microscopy images of Sf9 cells infected with vAc-*ph*, vAc<sup>ac13KO</sup>-*ph* or vAc<sup>ac13REP</sup>-*ph*  
692 at an MOI of 0.002 at 96 h p.i.. (F) Sf9 cells were infected with vAc-*ph*, vAc<sup>ac13KO</sup>-*ph*  
693 or vAc<sup>ac13REP</sup>-*ph* at an MOI of 0.002. The supernatants were collected at the indicated  
694 time points and determined by TCID<sub>50</sub> endpoint dilution assays. Each data points  
695 represent average titers from three separate infections. Error bars represent SD.

696

697 **FIG 5 Analysis of viral DNA replication and viral genes transcription.** (A) qPCR  
698 analysis of viral DNA replication. Total cellular DNAs were extracted at the indicated  
699 time points from Sf9 cells transfected with the bacmids of bAc<sup>ac13KO</sup>-*ph* or bAc-*ph*  
700 and were digested with restriction enzyme DpnI to eliminate input bacmid DNA. The  
701 genomes copies were analyzed with qPCR using the *gp41*-specific primer pairs. The  
702 values represent the averages from three independent assays. Error bars indicate SD.

703 (B) RT-qPCR analysis of viral genes transcription at 24 h p.t.. Total cellular RNA was  
704 extracted at 24 h p.t. from Sf9 cells which were transfected with bAc<sup>ac13KO</sup>-*ph* or  
705 bAc-*ph*. The transcription of selected viral genes was measured with RT-qPCR. The  
706 transcript level of each gene was normalized to that of the cell 18S rRNA. The values  
707 represent the averages from three independent assays, and error bars represent SD.

708

709 **FIG 6 Transmission electron microscopy analyses of Sf9 cells infected with**

710 **vAc-*ph*, vAc<sup>ac13KO</sup>-*ph* and vAc<sup>ac13REP</sup>-*ph*.** (A) Sf9 cells, infected with vAc-*ph*,

711 vAc<sup>ac13KO</sup>-*ph* or vAc<sup>ac13REP</sup>-*ph* at an MOI of 10, were fixed at 48 h p.i. and prepared

712 for TEM. (a to d) Cells infected with vAc-*ph*. (e to h) Cells infected with

713 vAc<sup>ac13KO</sup>-*ph*. (i to l) Cells infected with vAc<sup>ac13REP</sup>-*ph*. (a, e and i) Enlarged nucleus

714 (Nuc) and virogenic stroma (VS) in cells infected with vAc-*ph*, vAc<sup>ac13KO</sup>-*ph* or

715 vAc<sup>ac13REP</sup>-*ph*. (b, f and j) Normal electron-dense nucleocapsids (NC) in cells infected

716 with vAc-*ph*, vAc<sup>ac13KO</sup>-*ph* or vAc<sup>ac13REP</sup>-*ph*. (c, g and k) ODVs containing multiple

717 nucleocapsids and OBs embedding normal ODVs in cells infected with vAc-*ph*,

718 vAc<sup>ac13KO</sup>-*ph* or vAc<sup>ac13REP</sup>-*ph*. (d, h and l) Nucleocapsids residing in the cytoplasm or

719 budding from the nuclear or cytoplasmic membranes were indicated with red arrows,

720 while nucleocapsids residing in the nucleus were indicated with white arrows in cells.

721 The nuclear membrane was shown with white dotted line. Bars, 2 μm (a, e and i) and

722 500 nm (b to d, f to h and j to l). Nuc, nucleus; Cyt, cytoplasm; NM, nuclear

723 membrane; CM, cytoplasmic membrane. (B) The numbers of intranuclear

724 nucleocapsids (n.s. indicates no significance,  $p > 0.05$ ) (a) and egressed nucleocapsids

725 (\*\*\*) indicates  $p < 0.001$ , n.s. indicates no significance,  $p > 0.05$ ) (b) were determined.

726 Numbers were calculated from 20 cells.

727

728 **FIG 7 Scanning electron microscopy, transmission electron microscopy and**

729 **negative staining analysis of OBs from vAc-*ph*, vAc<sup>ac13KO</sup>-*ph* and vAc<sup>ac13REP</sup>-*ph*.**

730 (A) The OBs, purified from *S. exigua* larvae infected with vAc-*ph*, vAc<sup>ac13KO</sup>-*ph* or

731 vAc<sup>ac13REP</sup>-*ph*, were observed with Scanning electron microscopy (upper row),

732 transmission electron microscopy (middle row) and negative staining after treating by

733 dissolution buffer on the grid (lower row). (B) Numbers of ODVs embedded in each

734 OB. More than 40 OBs of each virus were analyzed. n.s. indicates no significance ( $p >$

735 0.05).

736

737 **TABLES**

738 **Table 1 Primers used in this study.**

| Primer name                        | Primer sequence (5`-3`) <sup>a</sup>                      |
|------------------------------------|-----------------------------------------------------------|
| <i>ac13</i> -US-F (SacI)           | CGAGCTCGCAAAGTTGGACAGTGATTAC                              |
| <i>ac13</i> -US-R (BamHI)          | CGGGATCCTGTACTTGAAACTGTGCG                                |
| <i>Cm<sup>r</sup></i> -F (BamHI)   | CGGGATCCTGTAGGCTGGAGCTGC                                  |
| <i>Cm<sup>r</sup></i> -R (HindIII) | CCC <u>AAGCTT</u> CATATGAATATCCTCCTTAGTTCC                |
| <i>ac13</i> -DS-F (HindIII)        | CCC <u>AAGCTT</u> GATCCAAACGCGATCTCAAC                    |
| <i>ac13</i> -DS-R (XhoI)           | CCGCTCGAGCTTCCATGTCGTCTTCAAAGC                            |
| <i>ph</i> -F (EcoRI)               | CGGAATTCACCATCTCGCAAATAATAAG                              |
| <i>ph</i> -R (SacI)                | CGAGCTCTGTATCGTGTTTTAATACGCC                              |
| <i>egfp</i> -F (SmaI)              | CCCCGGGATGGTGAGCAAGGGCGAGGAGC                             |
| <i>egfp</i> -R (XhoI)              | CCGCTCGAGTCACTTGTACAGCTCGTCCATGCCGAG                      |
| Dual- <i>ac13</i> -F1              | CCGGAGTAGGTCGTAGACGCCGATTAC                               |
| Dual- <i>ac13</i> -R1              | CAGAATCTTACAATACTTCCTGTATAACCTCTCTAAC                     |
| Dual- <i>ac13</i> -R2              | TTACTTATCGTCGCATCCTTGTAATCCAATACTTCCTGTAT<br>AACCTCTCTAAC |
| pFast- <i>ac13</i> -F1             | TATTGTAAGAATTCTGCAGATATCCAGCAC                            |
| pFast- <i>ac13</i> -F2             | TGACGACGATAAGTAAGAATTCTGCAGATATCCAGCAC                    |
| pFast- <i>ac13</i> -R1             | CTACGACCTACTCCGGAATATTAATAGATCATGGAG                      |
| <i>iel</i> -F                      | ATGACGCAAATTAATTTAACGCGTC                                 |
| <i>iel</i> -R                      | CATATTTGTTTGGGGGATTGTCCG                                  |
| <i>gp64</i> -F                     | ATGGTAAGCGCTATTGTTTTATATGTGC                              |
| <i>gp64</i> -R                     | GAAGTCAATTTAGCGGCCAATTCG                                  |
| <i>vp39</i> -F                     | CGACAAATGAGAGTTAATCGCTGC                                  |
| <i>vp39</i> -R                     | TTAGACGGCTATTCCTCCACCTG                                   |
| <i>ac13</i> -F                     | ATGCTATCCTGGTTATGG                                        |
| <i>ac13</i> -R                     | TTACAATACTTCCTGTATAACCTC                                  |
| <i>qgp41</i> -F                    | CGTAGTGGTAGTAATCGCCGC                                     |
| <i>qgp41</i> -R                    | AGTCGAGTCGCGTCGCTTT                                       |
| <i>qiel</i> -F                     | TGTGATAAACAACCCAACGAC                                     |
| <i>qiel</i> -R                     | GTTAACGAGTTGACGCTTG                                       |
| <i>qpe38</i> -F                    | AATGGAACAGCAGCGAATGA                                      |
| <i>qpe38</i> -R                    | GTCGCACGTAGTCGGAATC                                       |
| <i>qgp64</i> -F                    | ACGACCTGATAGTCTCCGTG                                      |
| <i>qgp64</i> -R                    | TGTAGCAATTACTGGTGTGTGC                                    |
| <i>qvp39</i> -F                    | TTGCGCAACGACTTTATACC                                      |
| <i>qvp39</i> -R                    | TAGACGGCTATTCCTCCACC                                      |
| <i>qp6.9</i> -F                    | GTTCTTCAACCGGTACCACATATG                                  |
| <i>qp6.9</i> -R                    | AGTAGCGTGTCTGTAACCTTCG                                    |
| <i>qpplh</i> -F                    | TTAGGTGCCGTTATCAAGA                                       |

|                              |                                                                        |
|------------------------------|------------------------------------------------------------------------|
| <i>qpolh</i> -R              | <u>G</u> CCACTAGGTAGTTGTCT                                             |
| <i>q18s</i> -F               | TACCGATTGAATGATTTAGTGAGG                                               |
| <i>q18s</i> -R               | TACGGAAACCTTGTTACGACTTT                                                |
| pIB-F1                       | <u>G</u> TCCAGTGTGGTGGAAATTCTG                                         |
| pIB-F2                       | <u>C</u> GGCGGCAGCGGC <u>G</u> CGGCAGCCCCGGGATGGTGAGCAA<br>GGGCGAGGAGC |
| pIB-R                        | <u>T</u> AGTGGATCCGAGCTCGGTAC                                          |
| pIB- <i>egfp</i> -F          | <u>G</u> AGCTCGGATCCACTAATGGTGAGCAAGGGCGAGGAGC                         |
| pIB- <i>egfp</i> -R          | <u>T</u> TCCACCACACTGGACCTACTTGTACAGCTCGTCCATGCCG<br>AG                |
| pIB- <i>ac13</i> -F          | <u>G</u> AGCTCGGATCCACTAATGCTATCCTGGTTATGG                             |
| pIB- <i>ac13</i> -R          | <u>G</u> CCGCCGCTGCCGCCGCTGCCGCCCCAATACTTCCTGTA<br>TAACC               |
| <i>ac13</i> - $\Delta$ NLS-F | <u>G</u> CCAAGAGGACGACATGGAAGTACTCTATGAC                               |
| <i>ac13</i> - $\Delta$ NLS-R | <u>A</u> TGTCGTCCTCTTGGCCAAAACAAAAGC                                   |
| <i>ac13</i> -GSP1            | GATTACGCCAAGCTTGTGATGTCGCGCGGAAACGTCACCG<br>TGC                        |

739 <sup>a</sup> Restriction sites and homologous sequences were underlined.

740

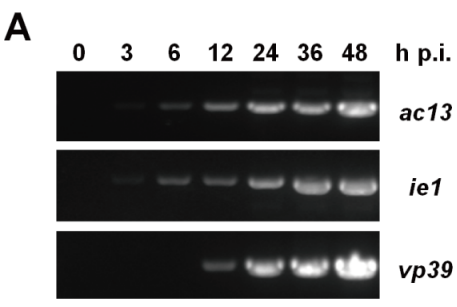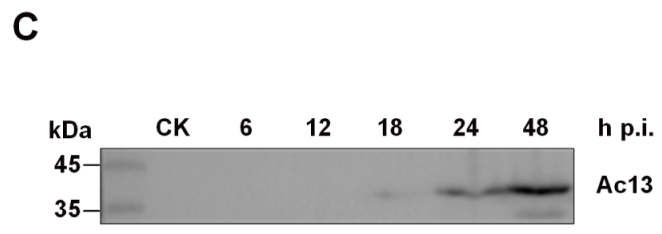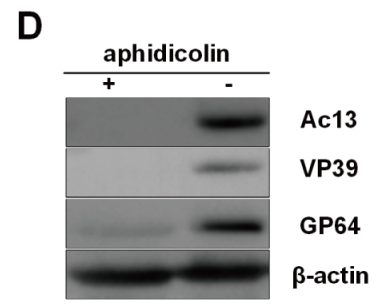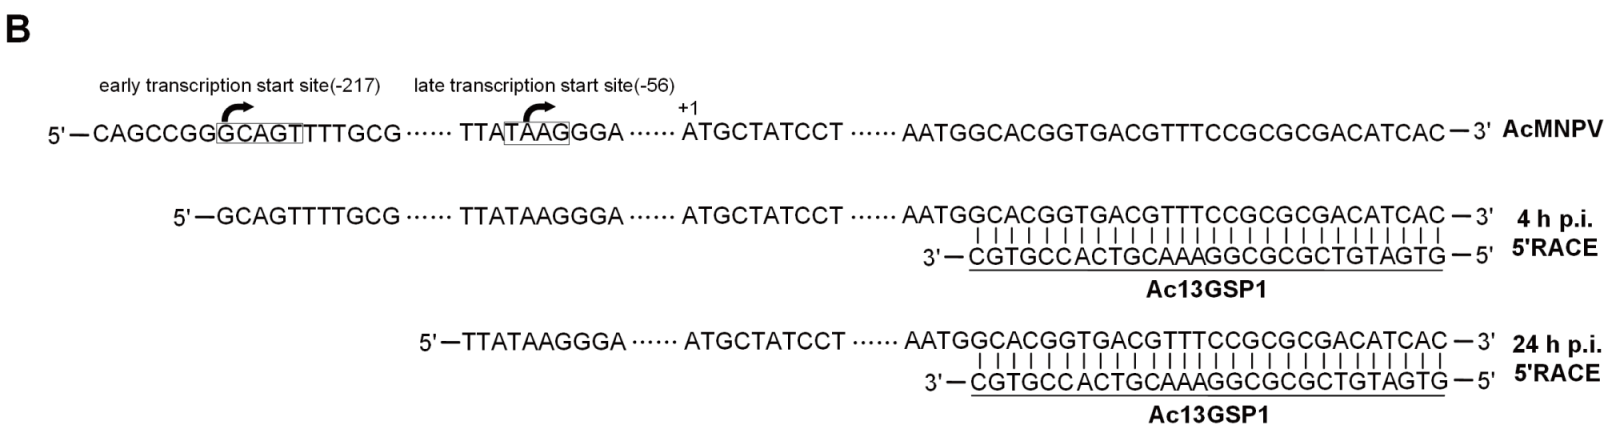

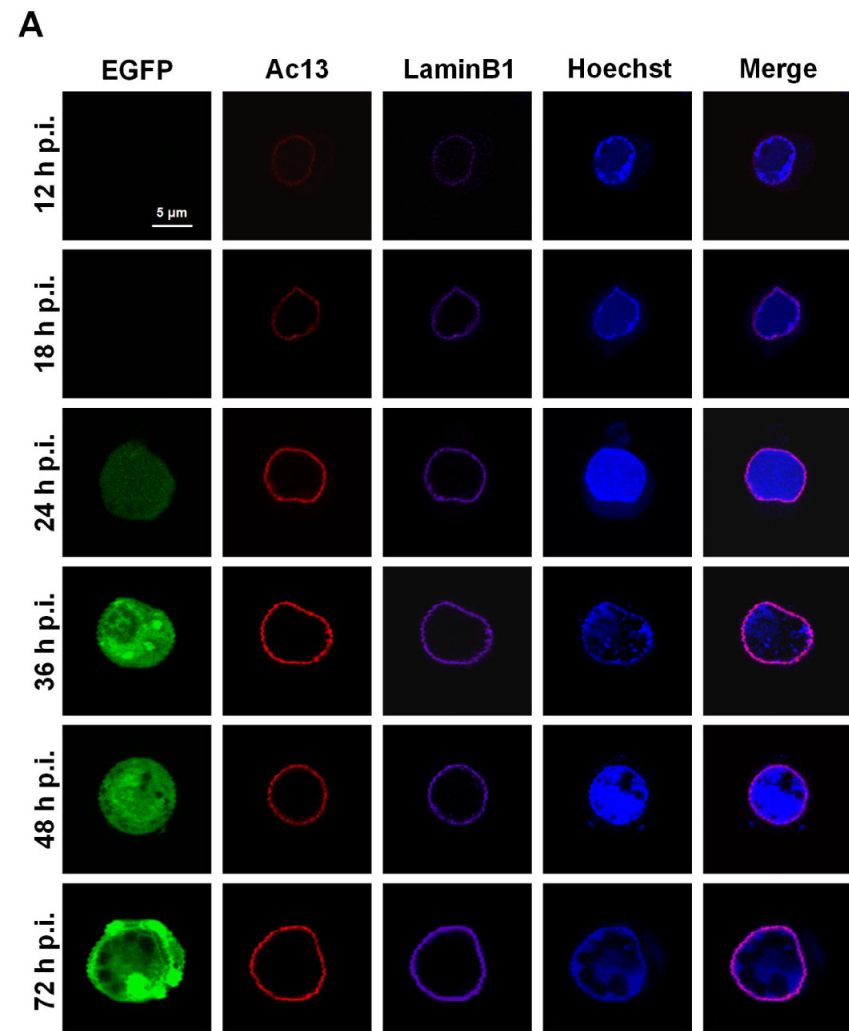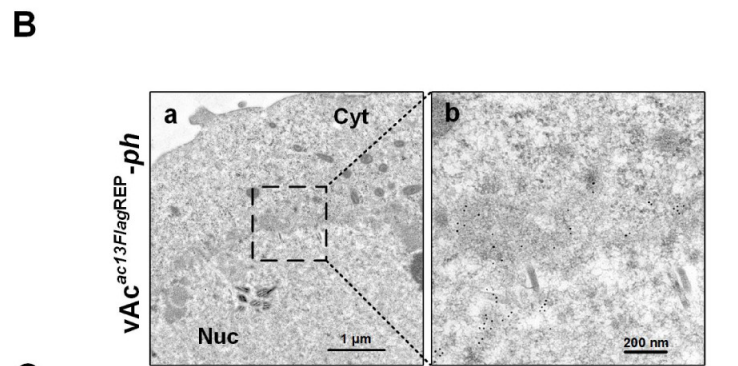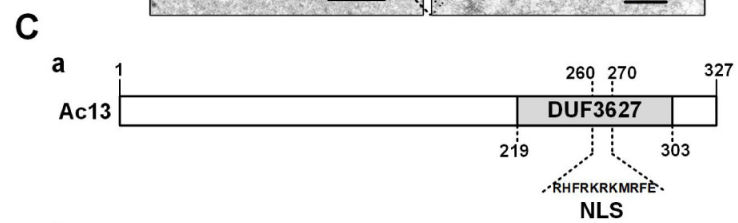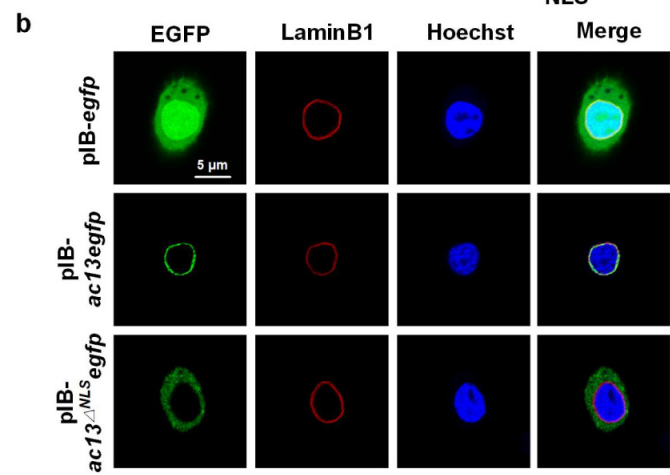



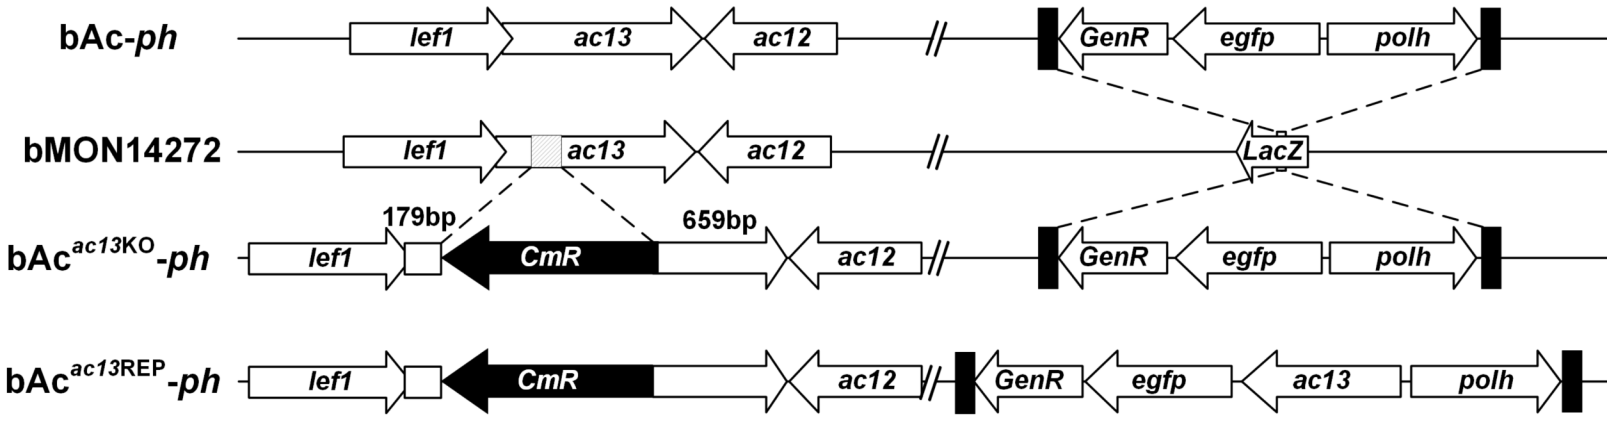

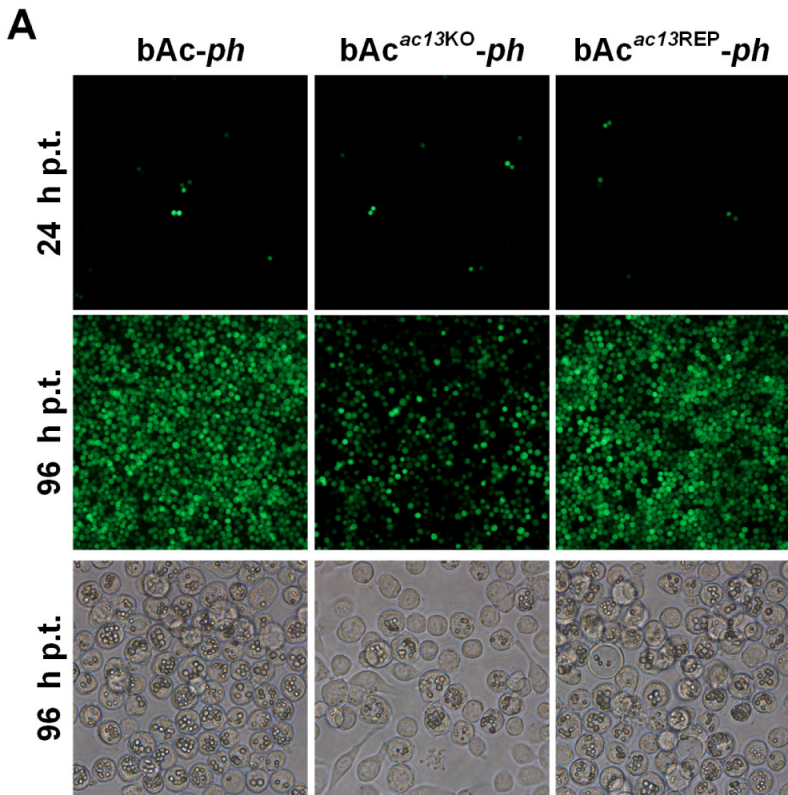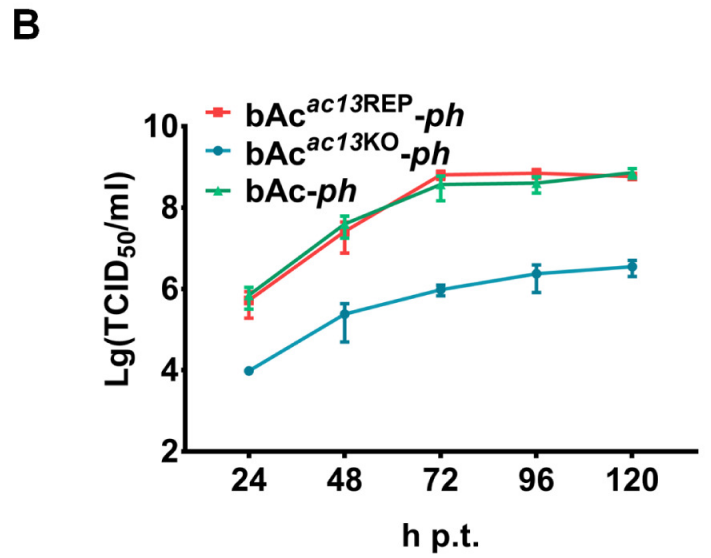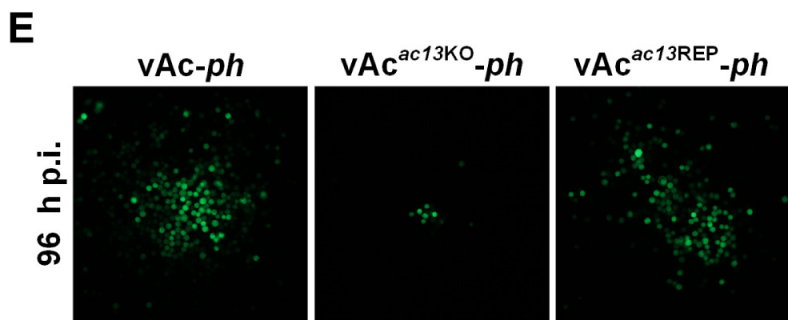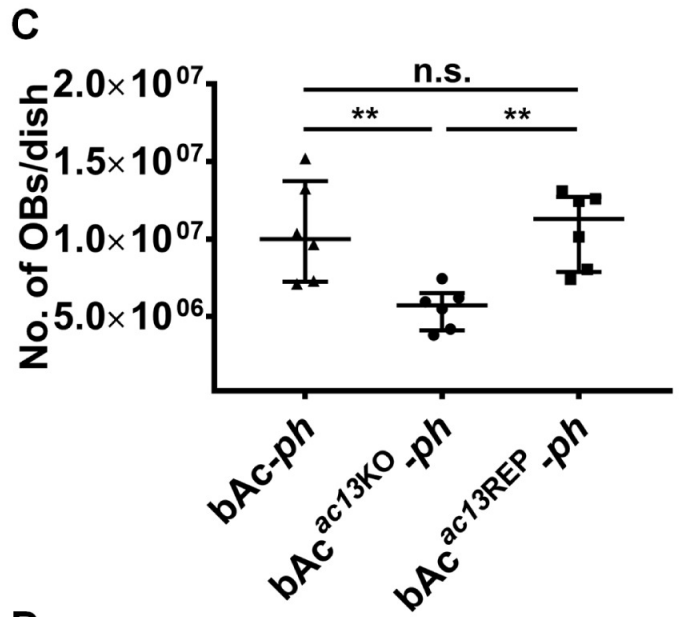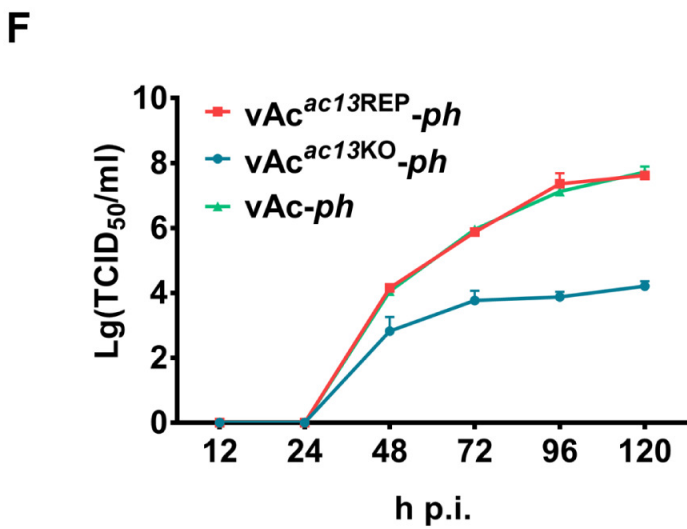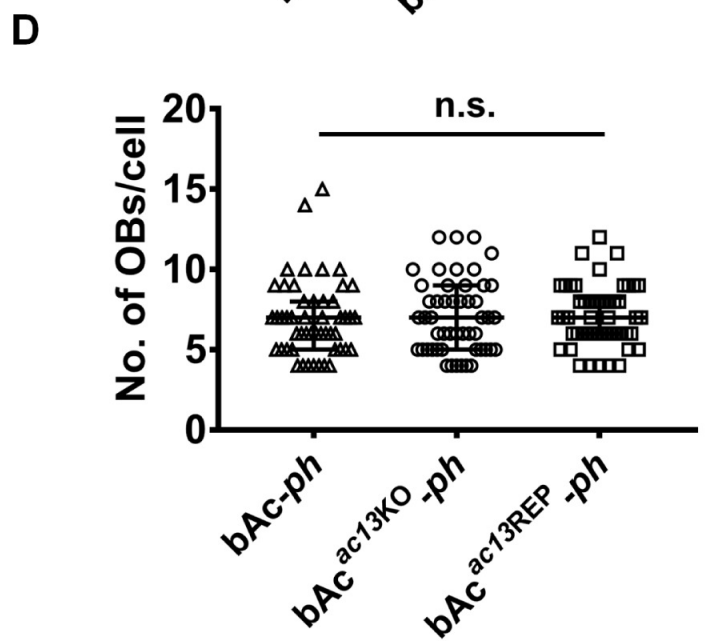

**A**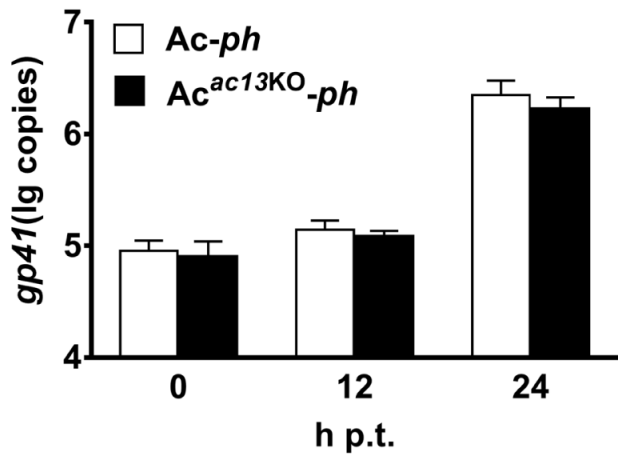**B**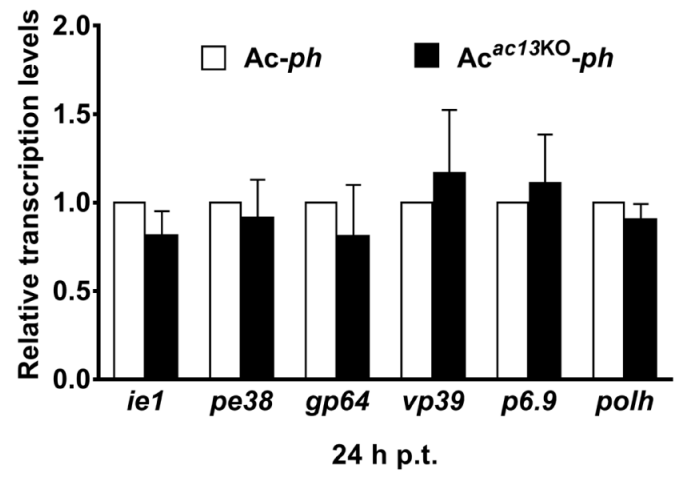

**A**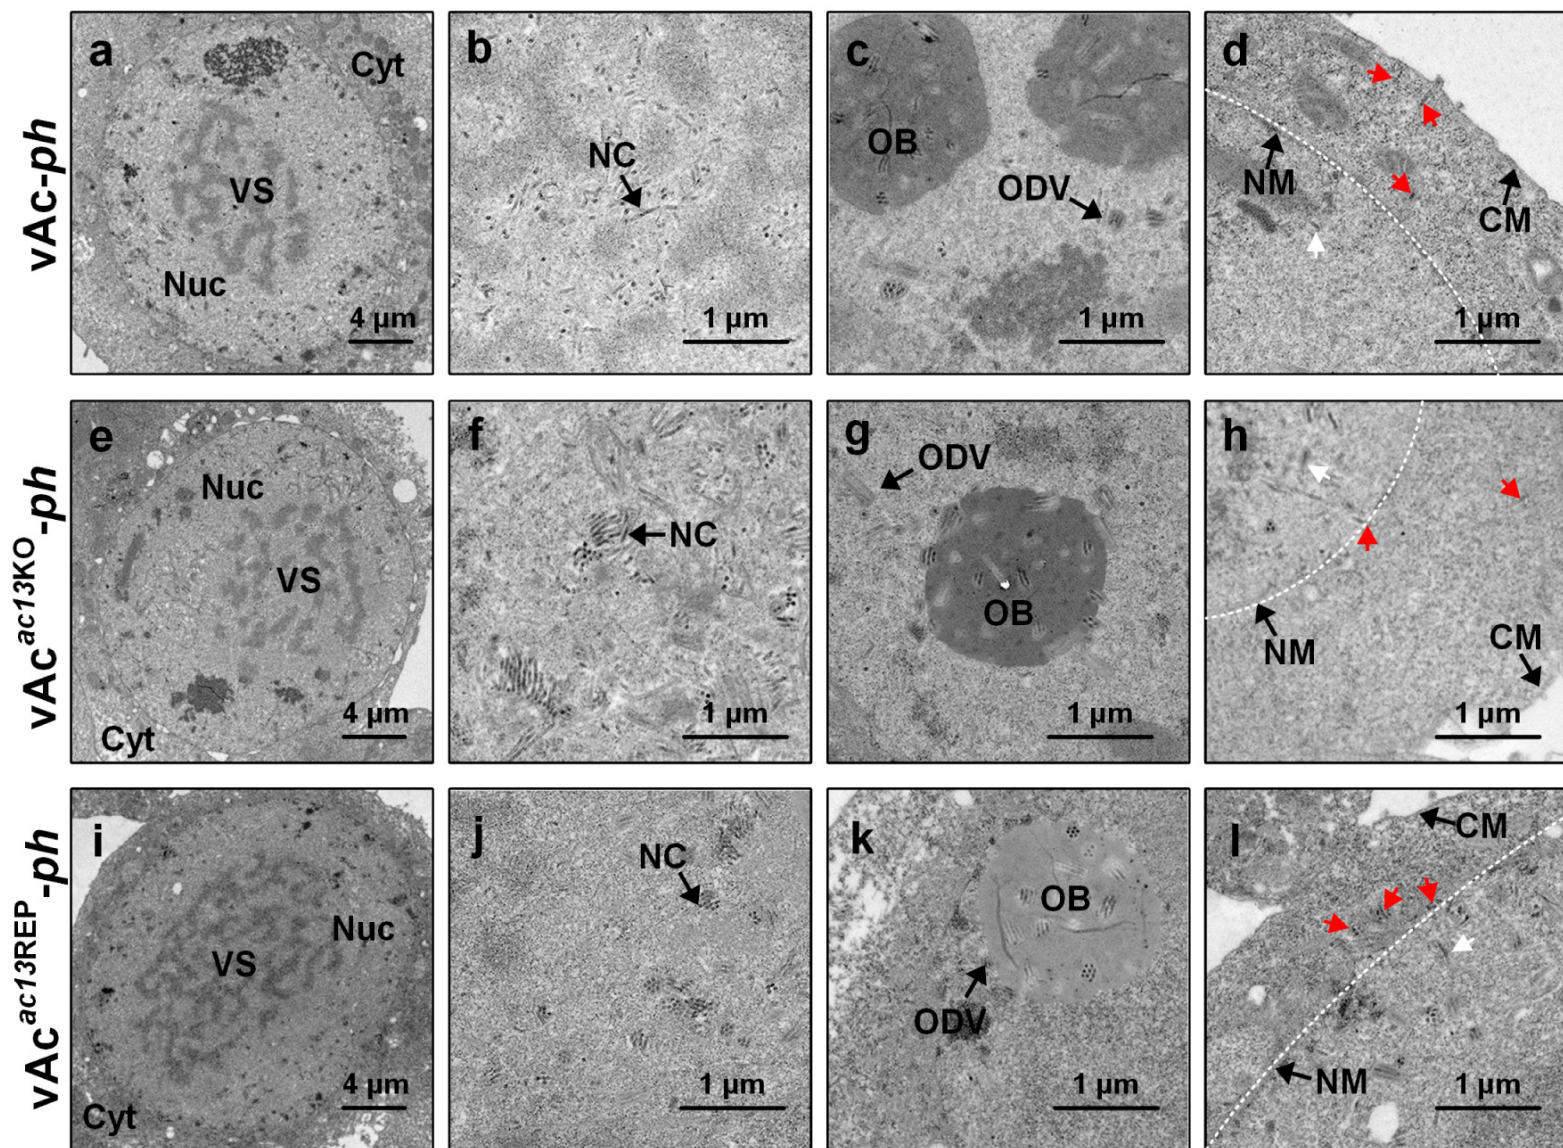**B**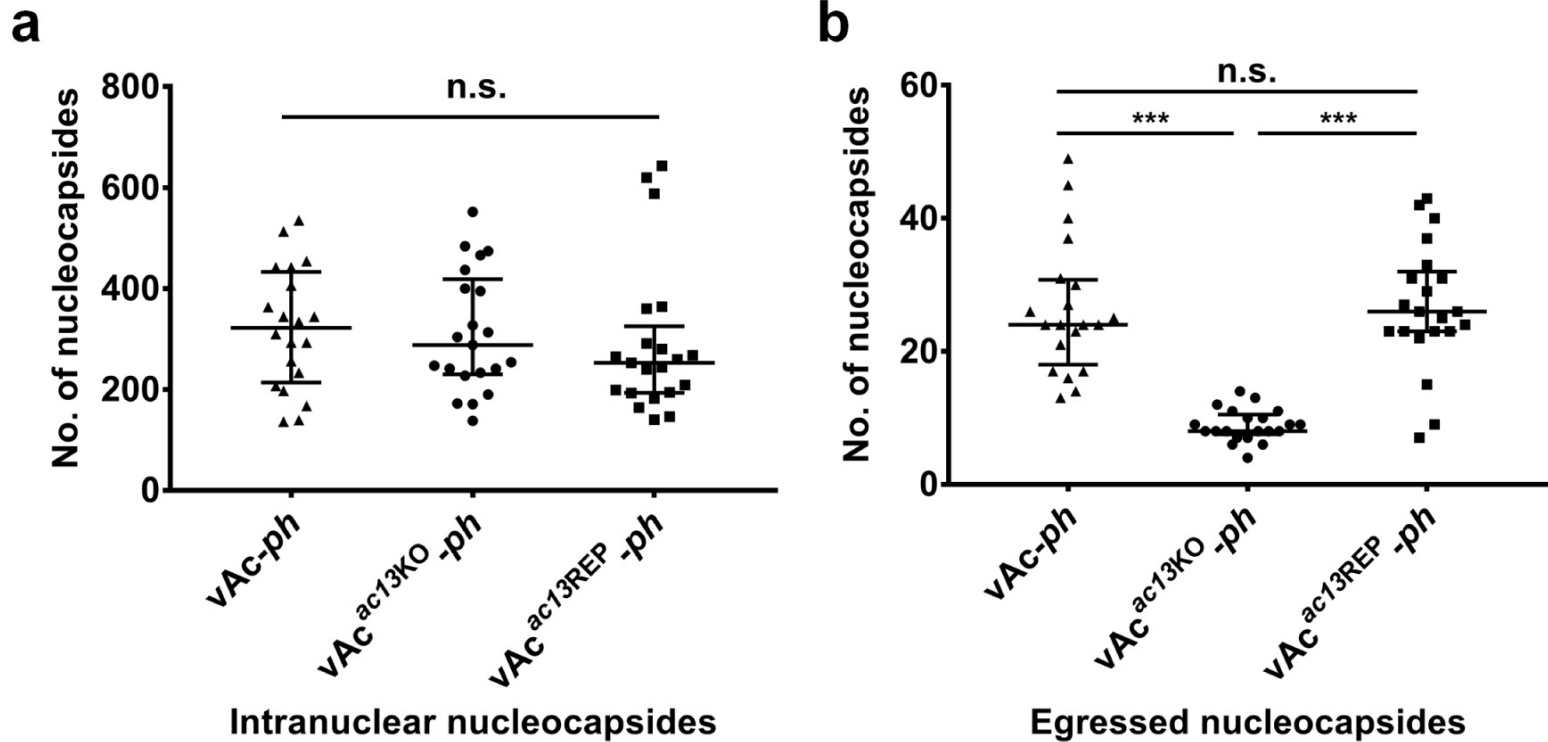

**A**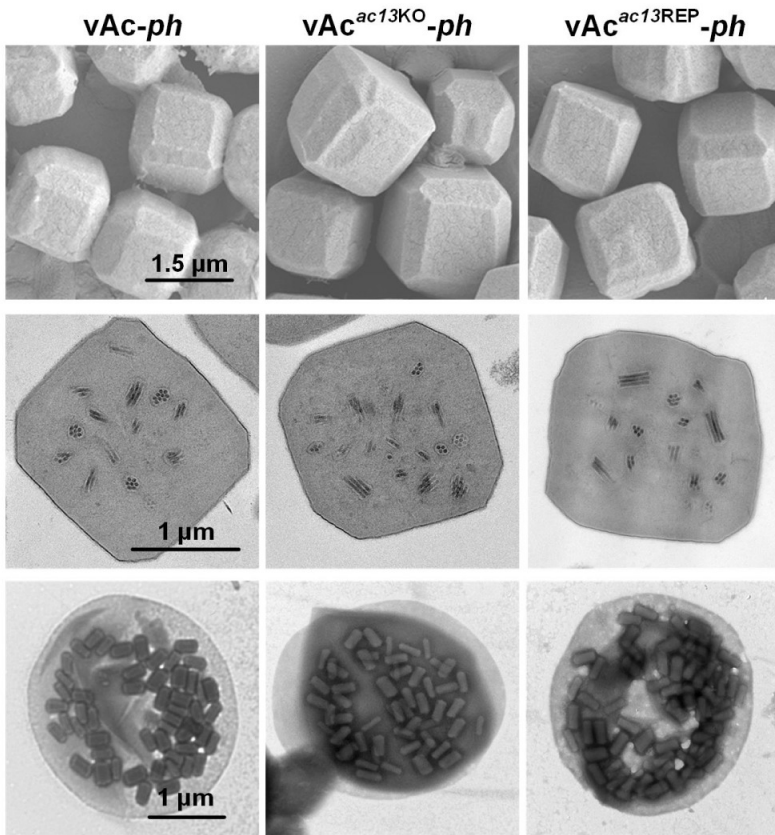**B**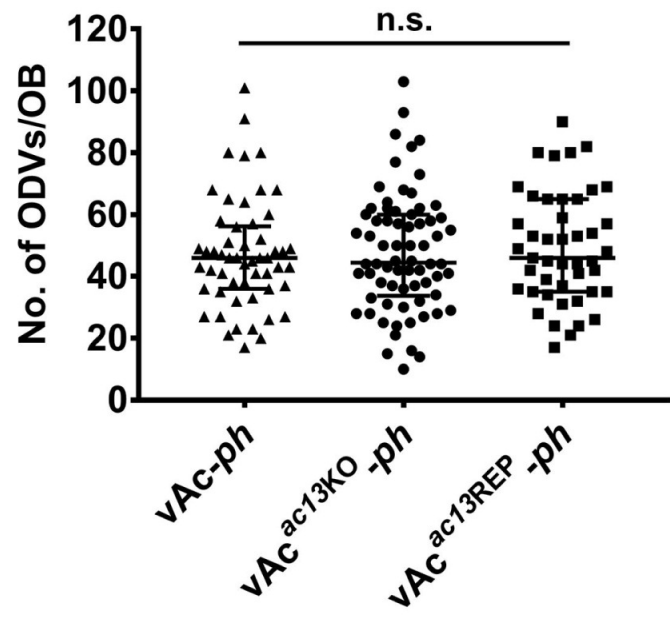

Source: https://www.biorxiv.org/content/10.1101/2020.07.13.201756v1.full.pdf
